# Supplementary material
Source: PubMed Central journal article supplement (PMC4804179)

# Mean Hippocampus

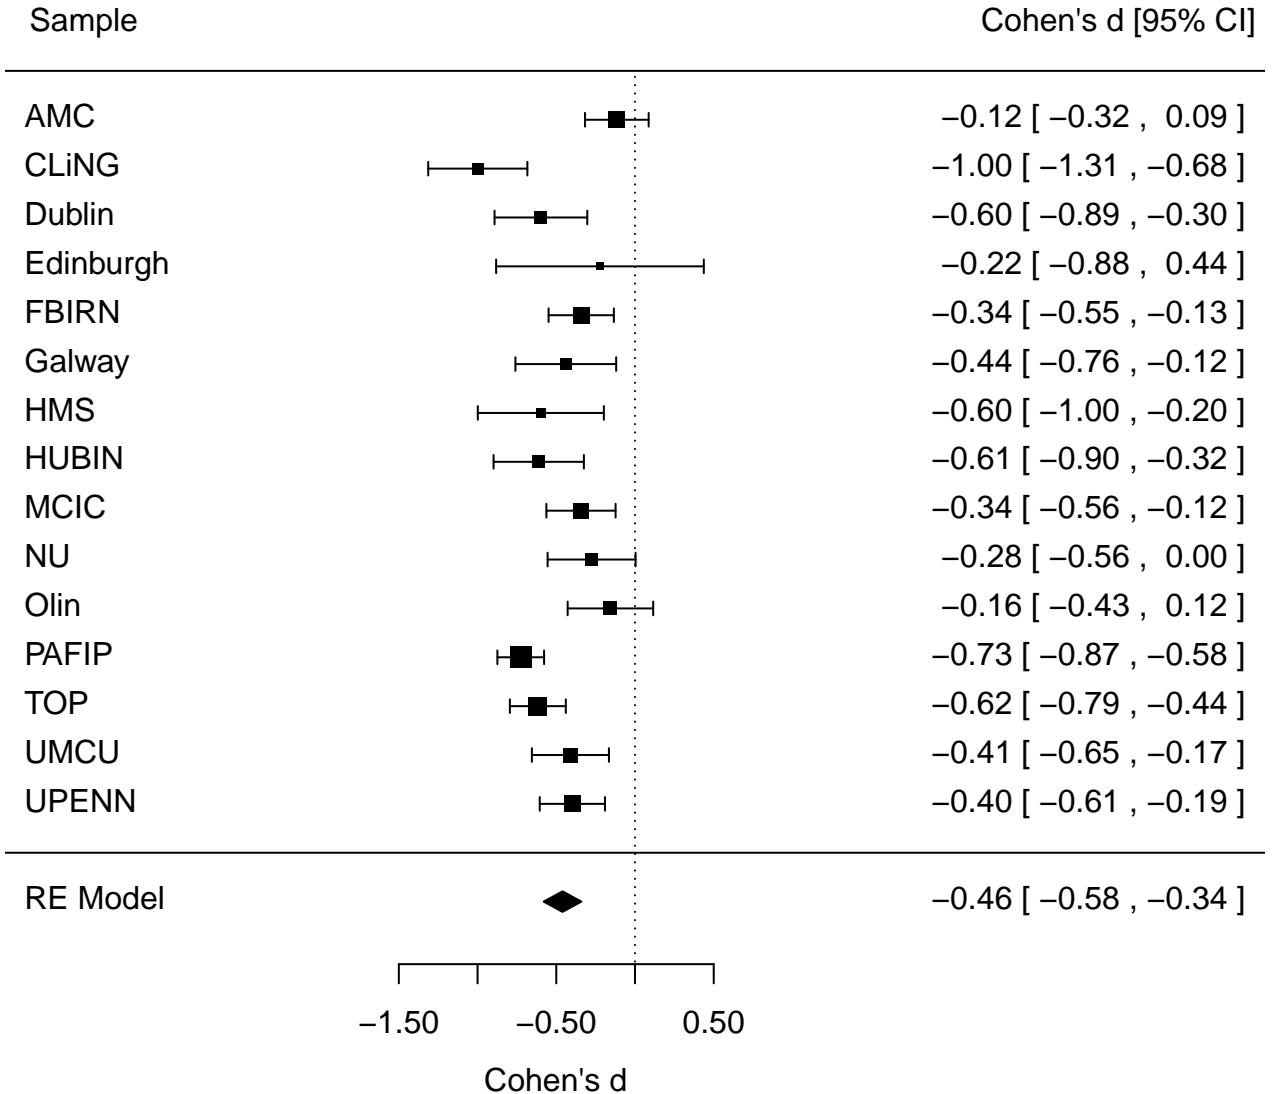

# Left Hippocampus

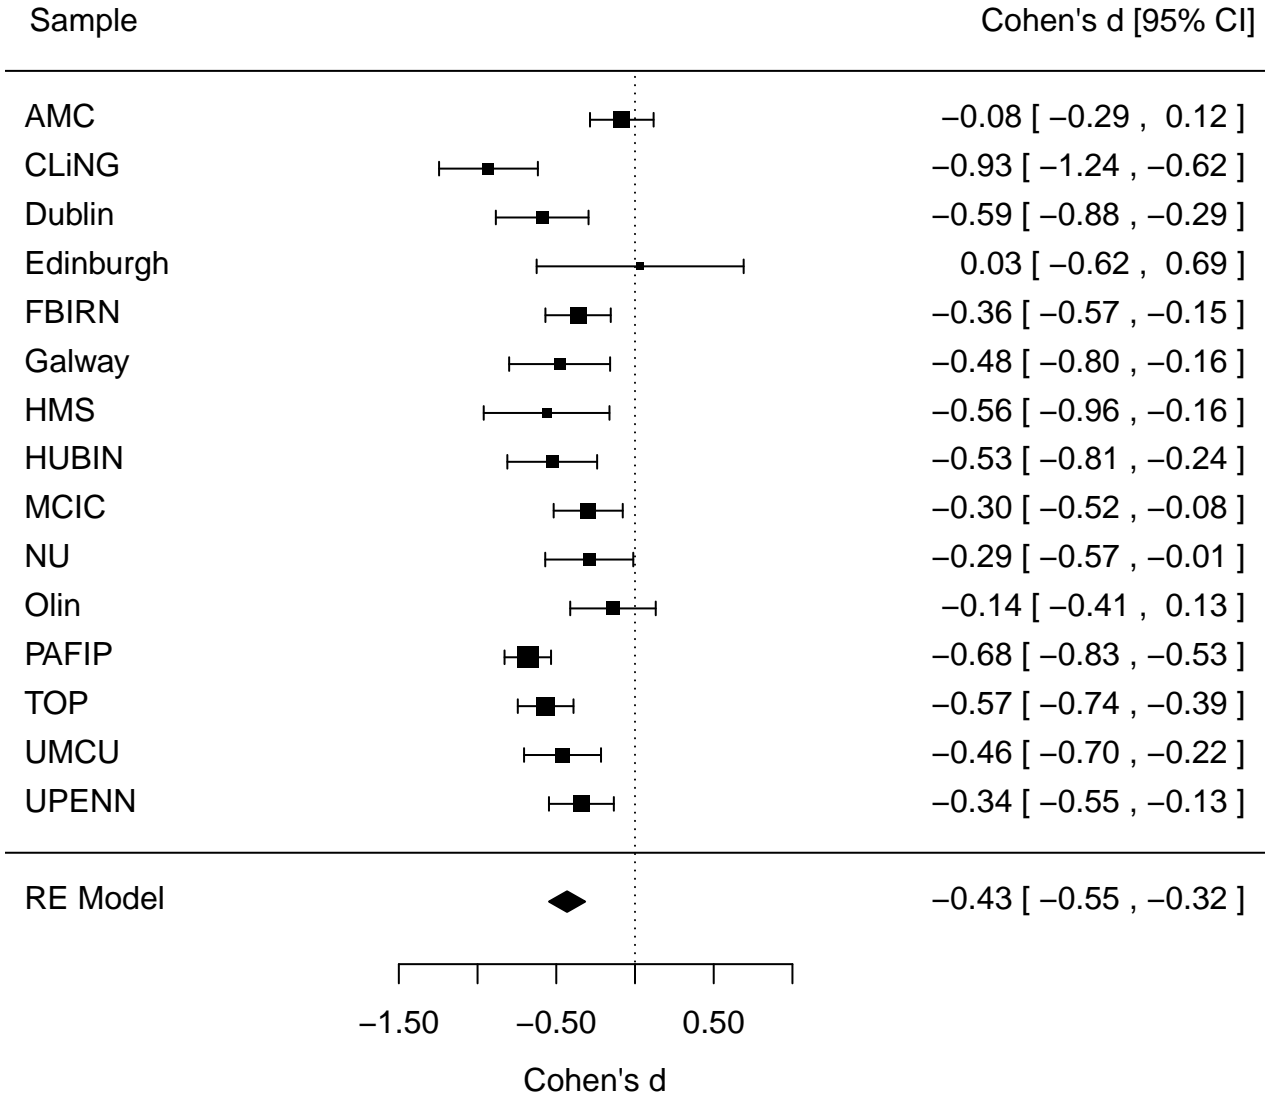

# Right Hippocampus

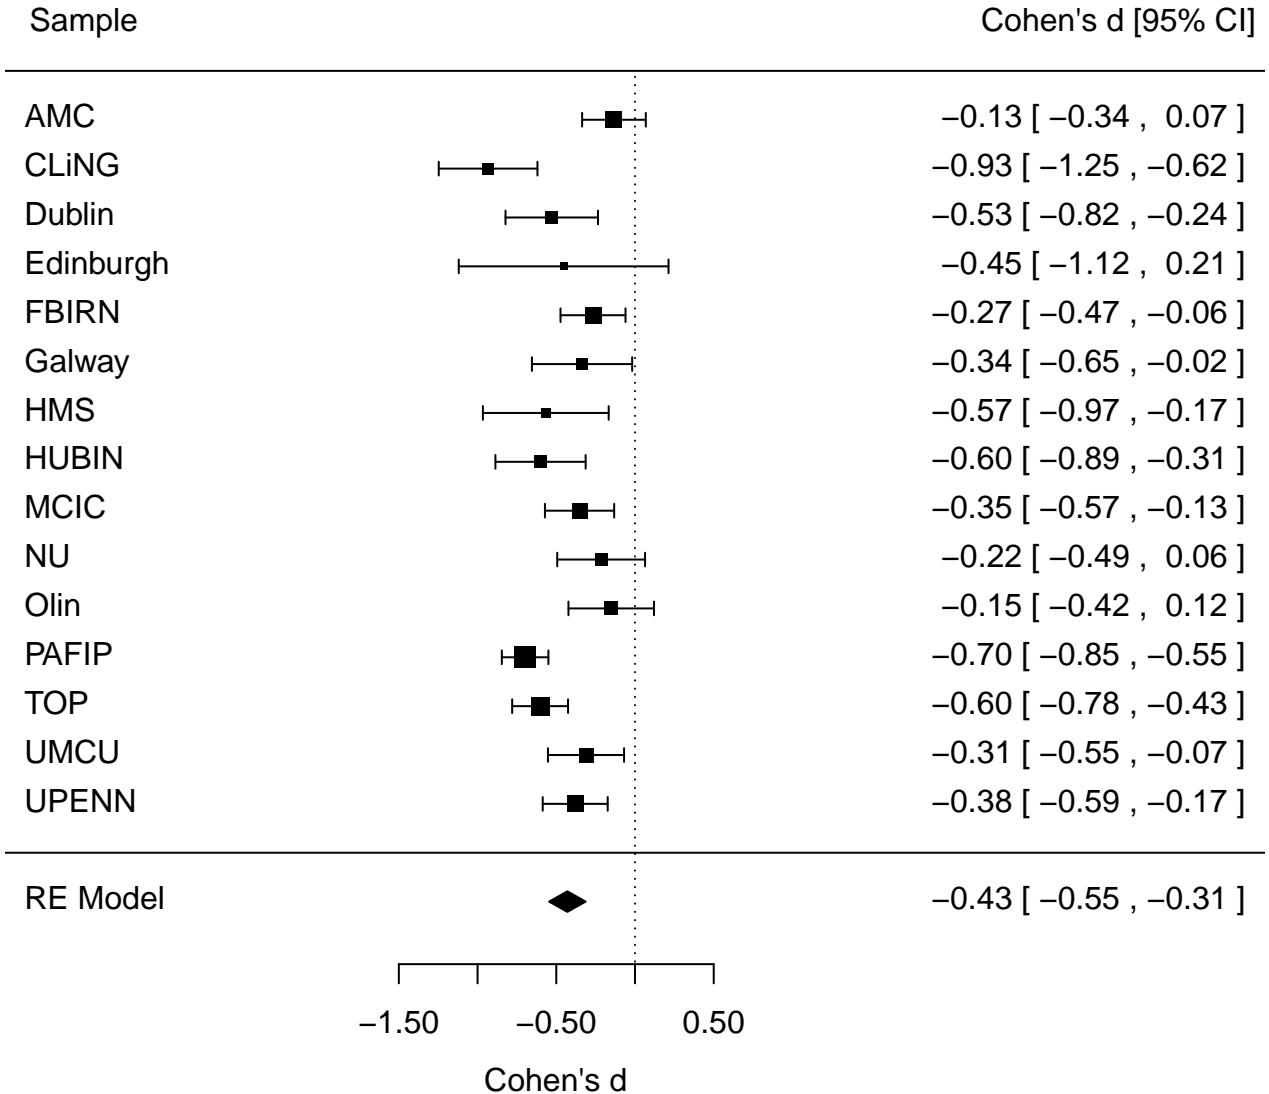

# Mean Amygdala

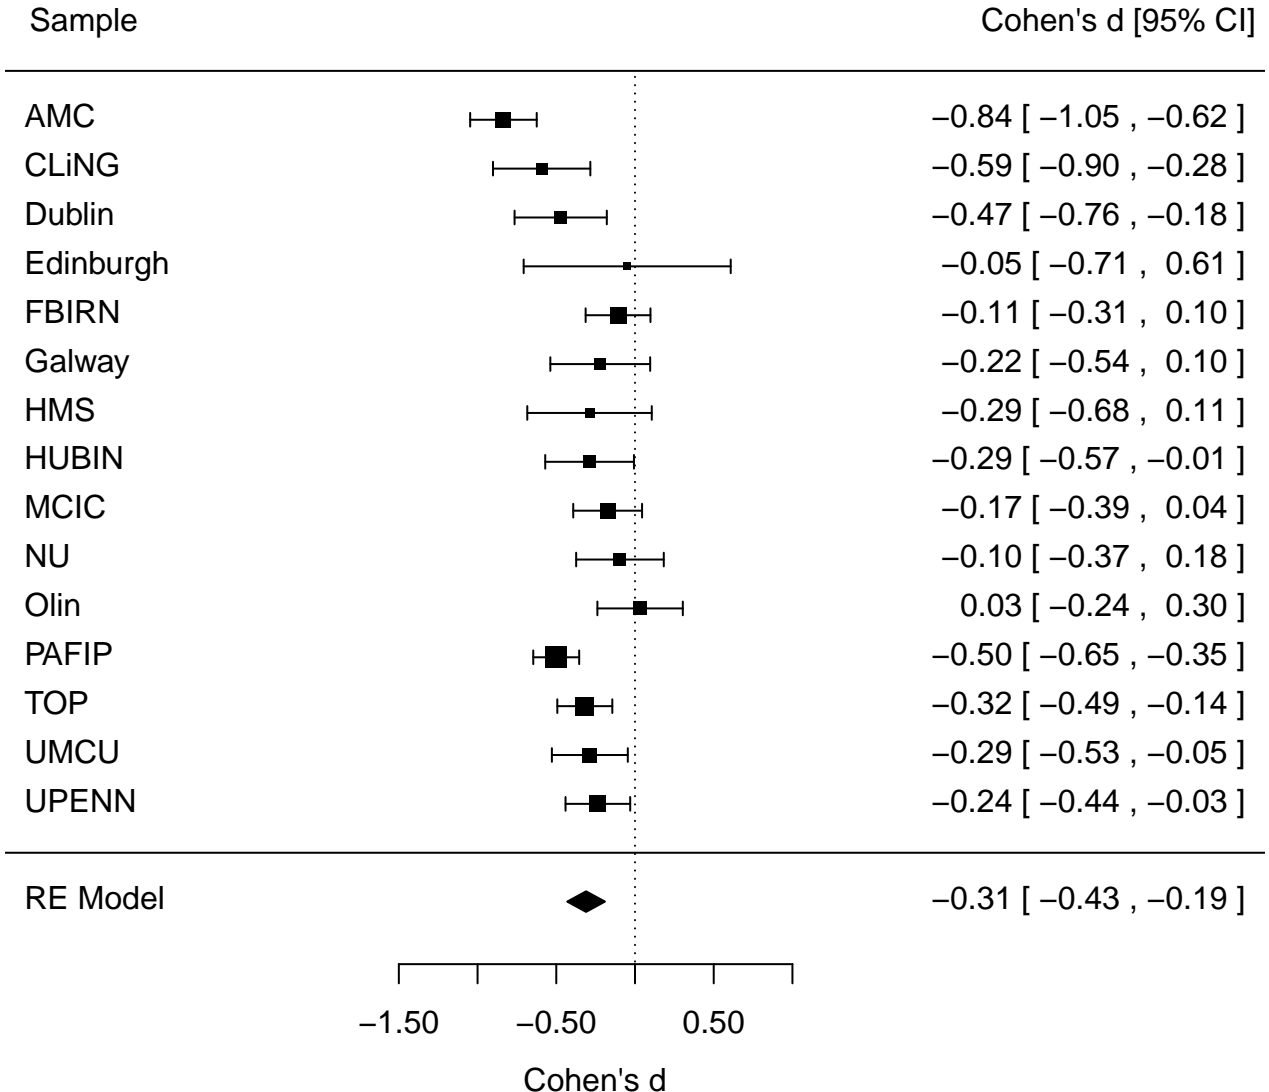

# Left Amygdala

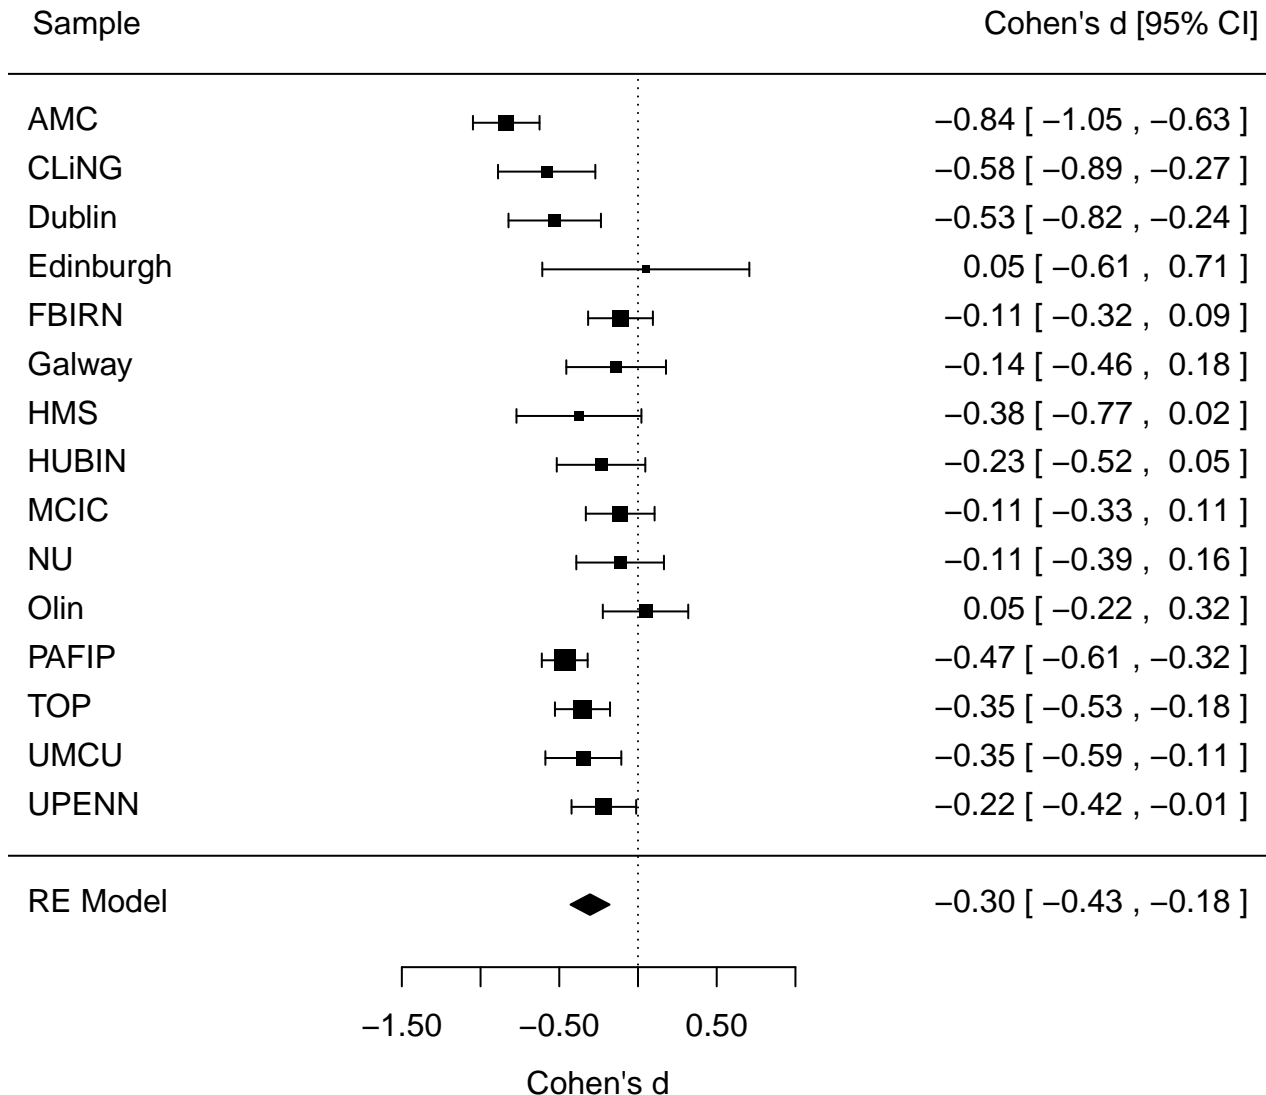

# Right Amygdala

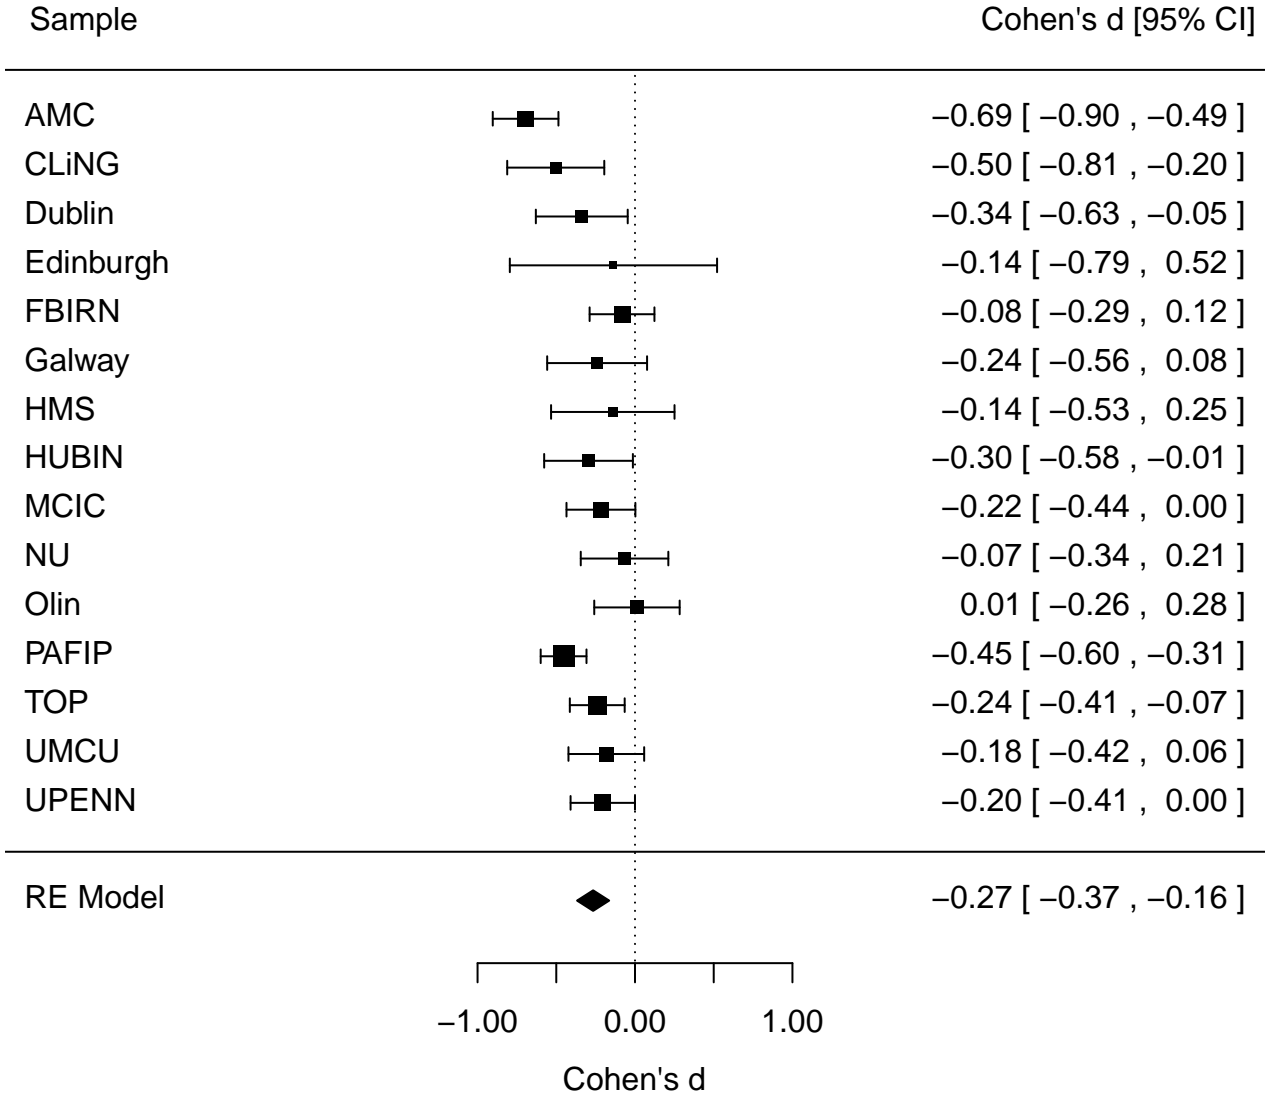

# Mean Thalamus

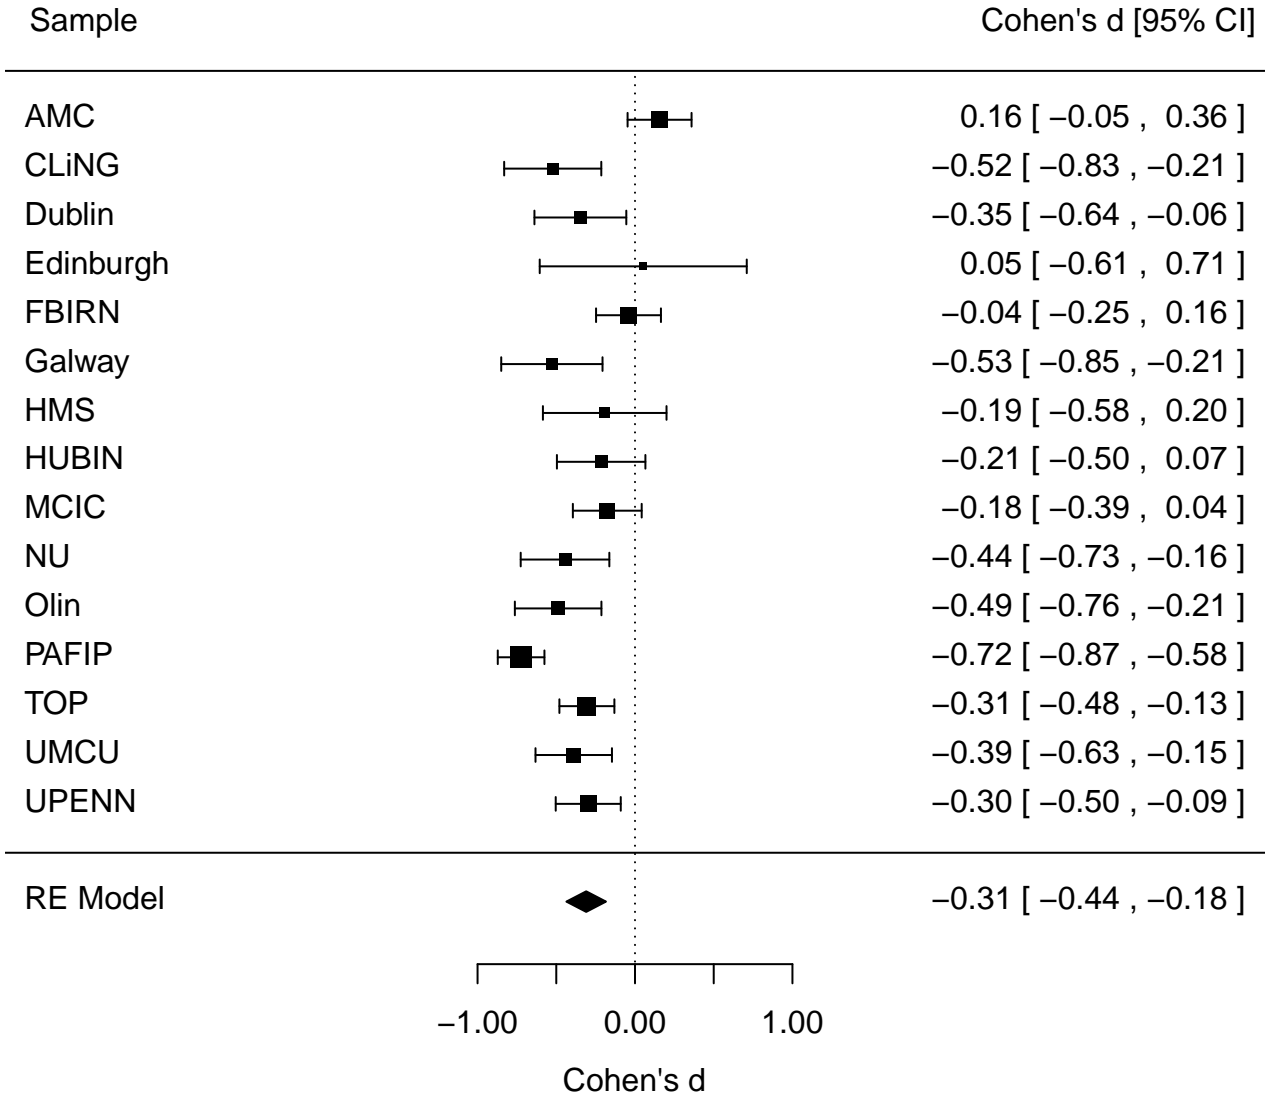

# Left Thalamus

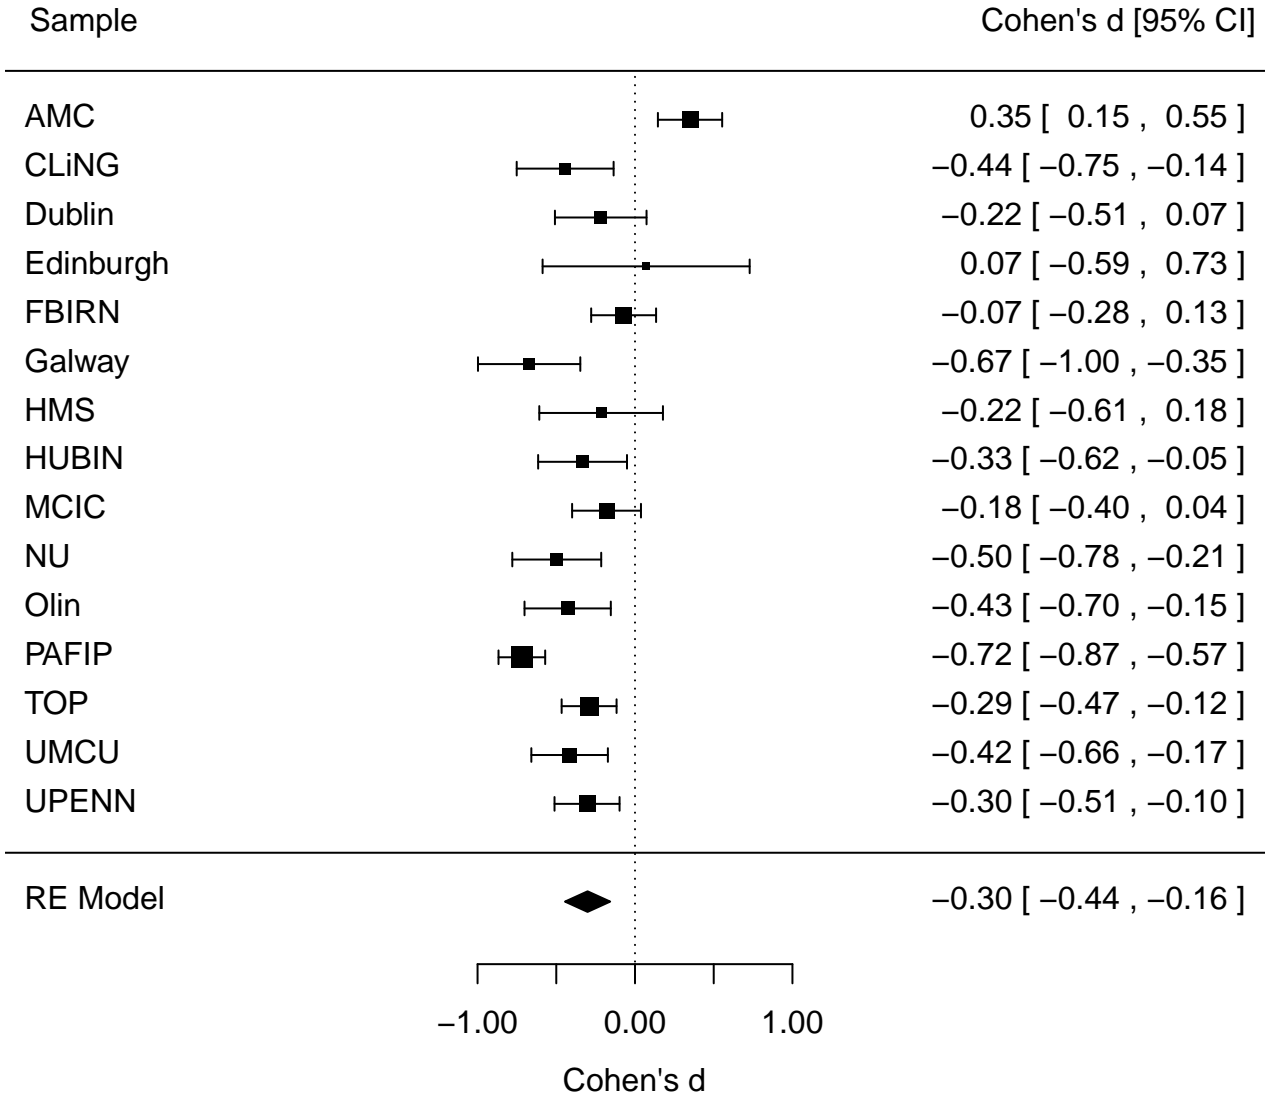



# Right Thalamus

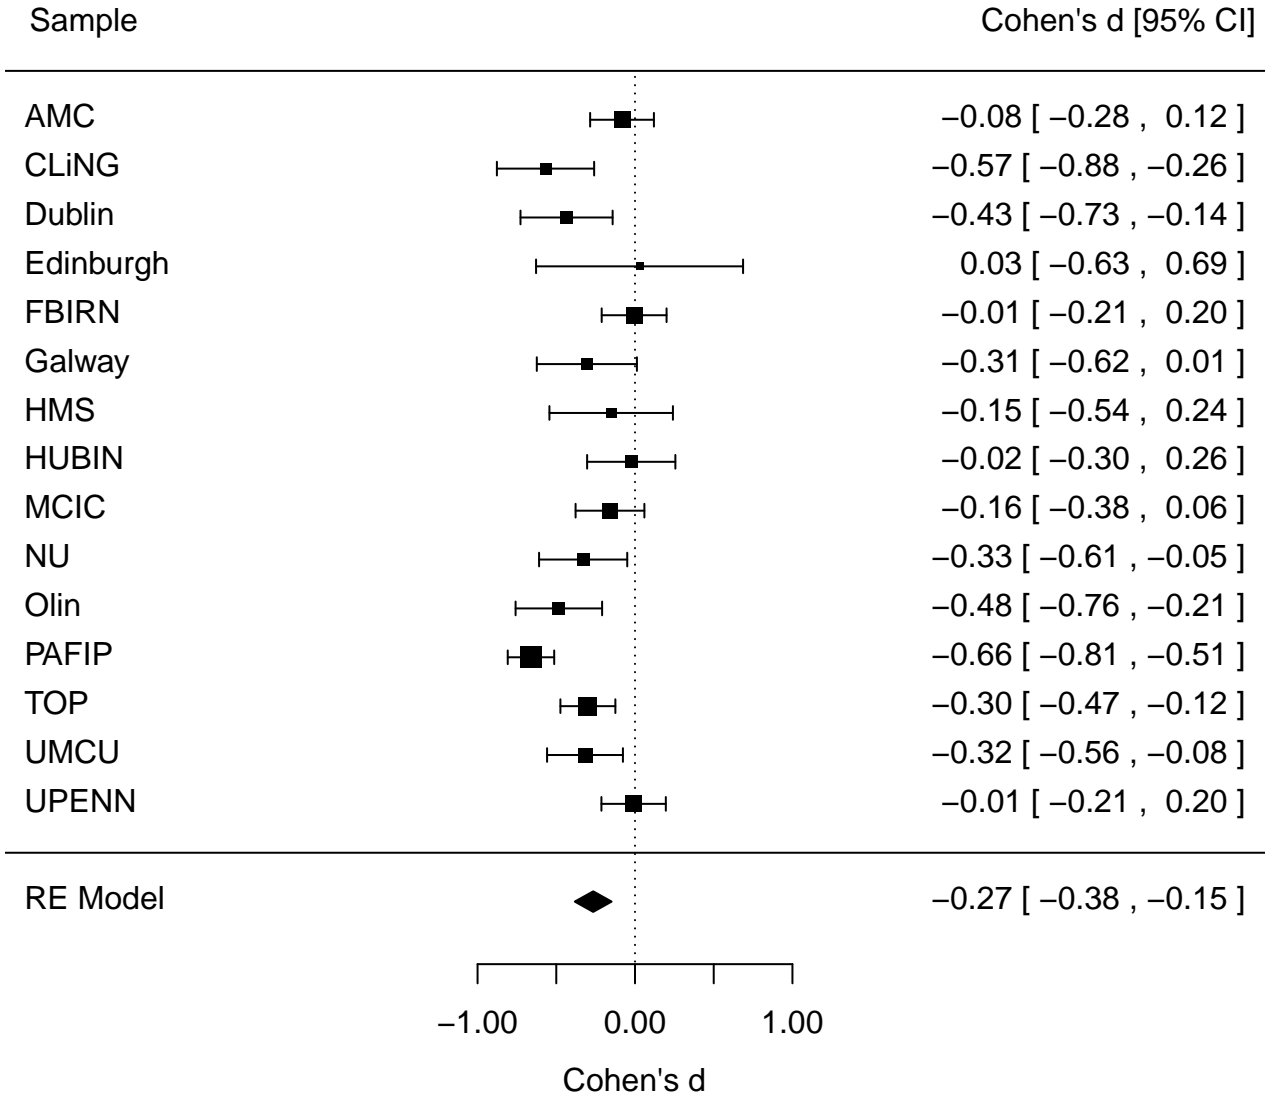

# Mean Accumbens

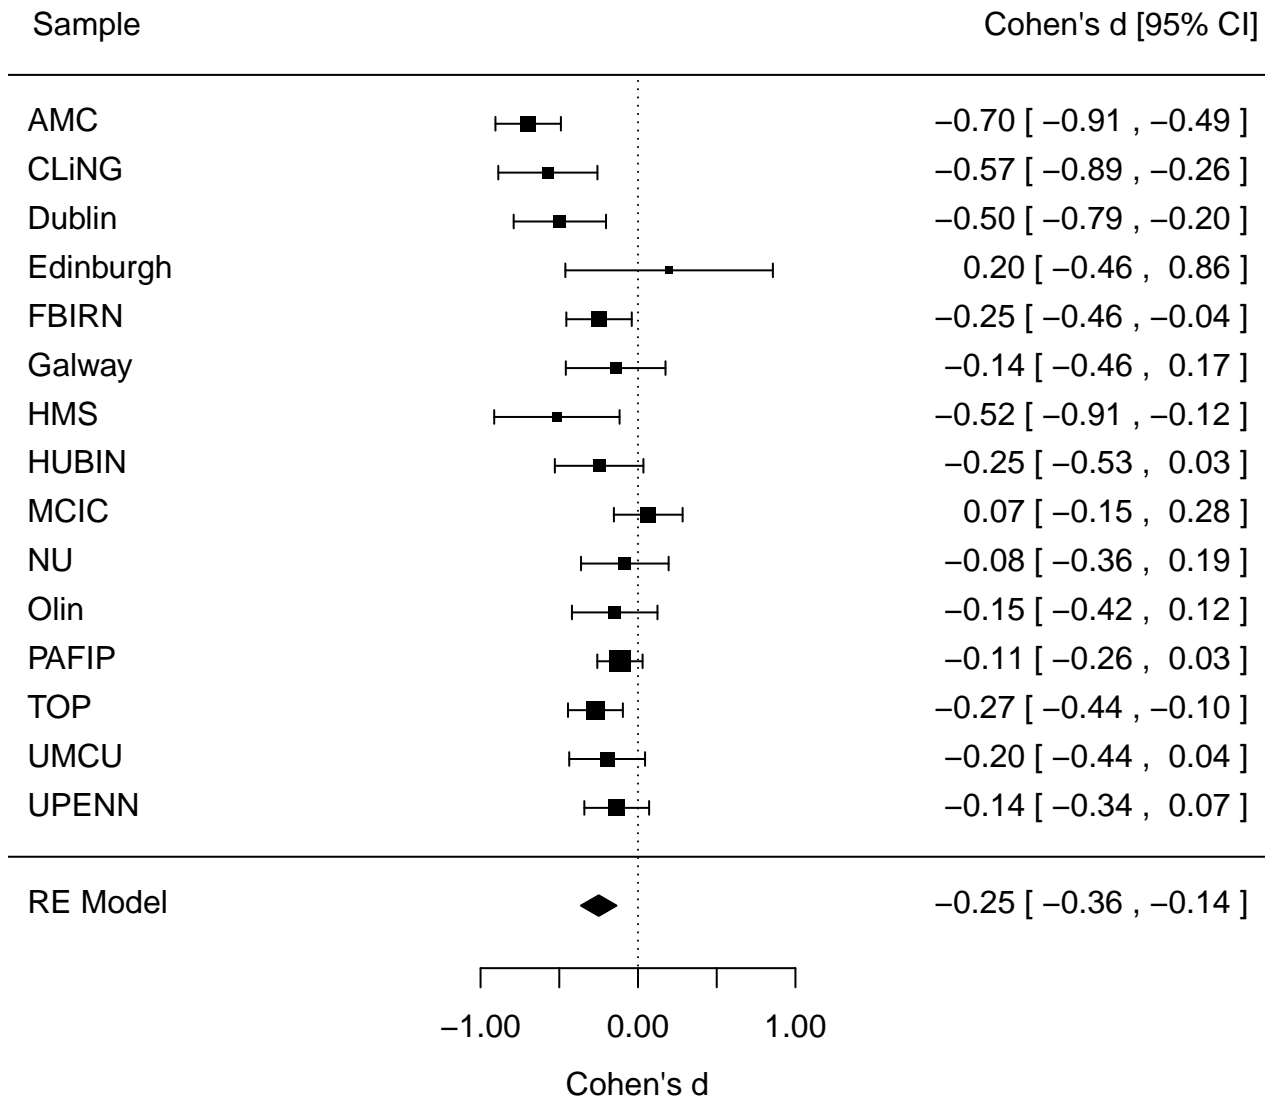

# Left Accumbens

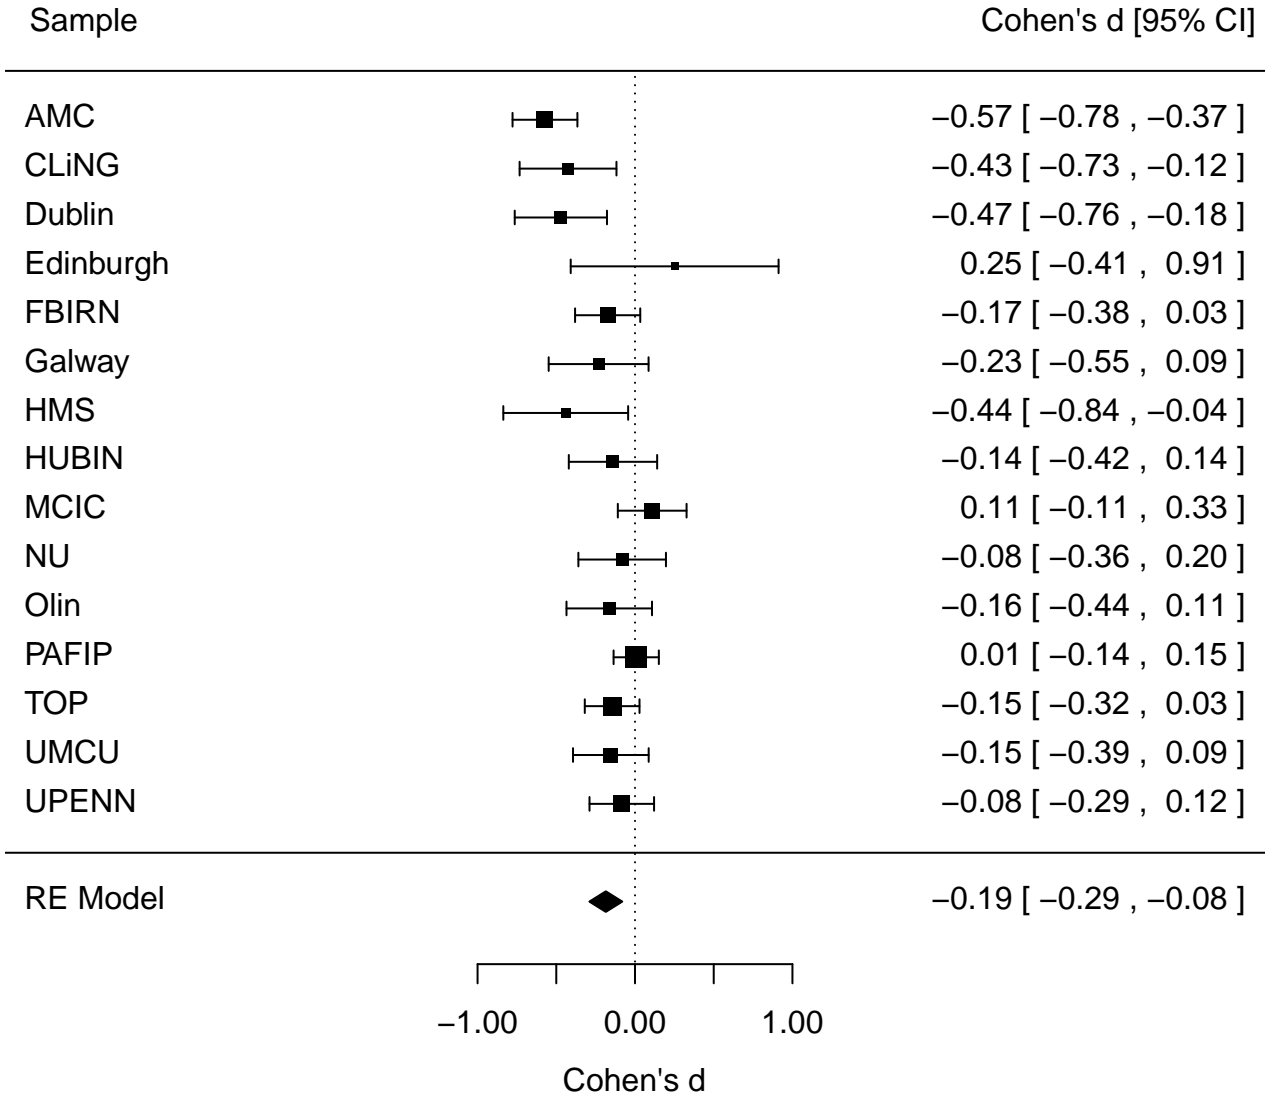

## Right Accumbens

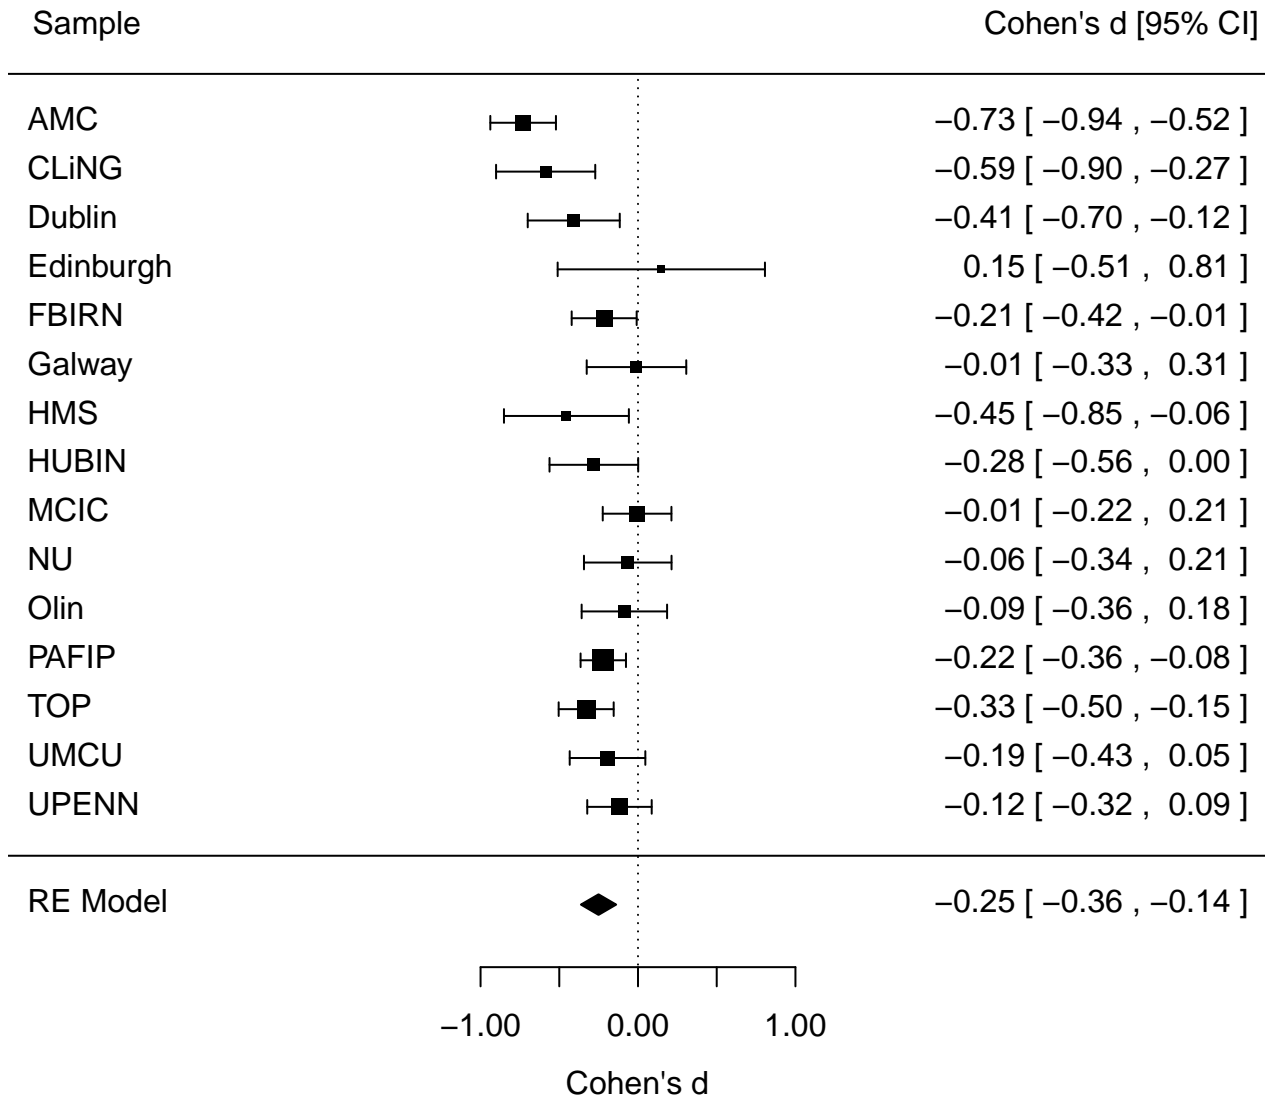

# Intracranial Volume

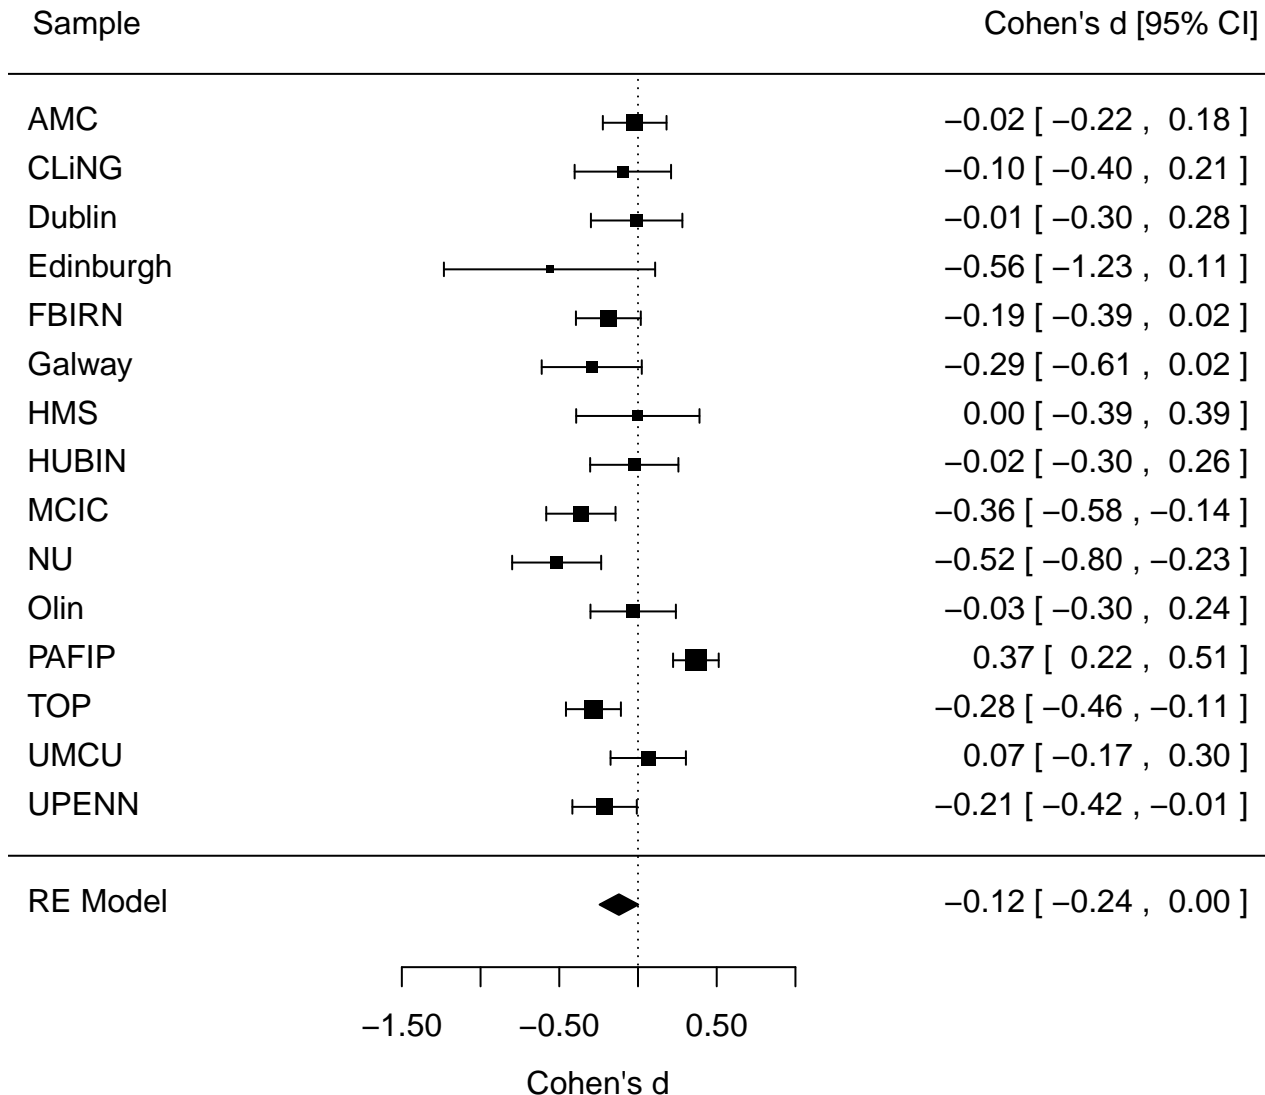

# Mean Caudate

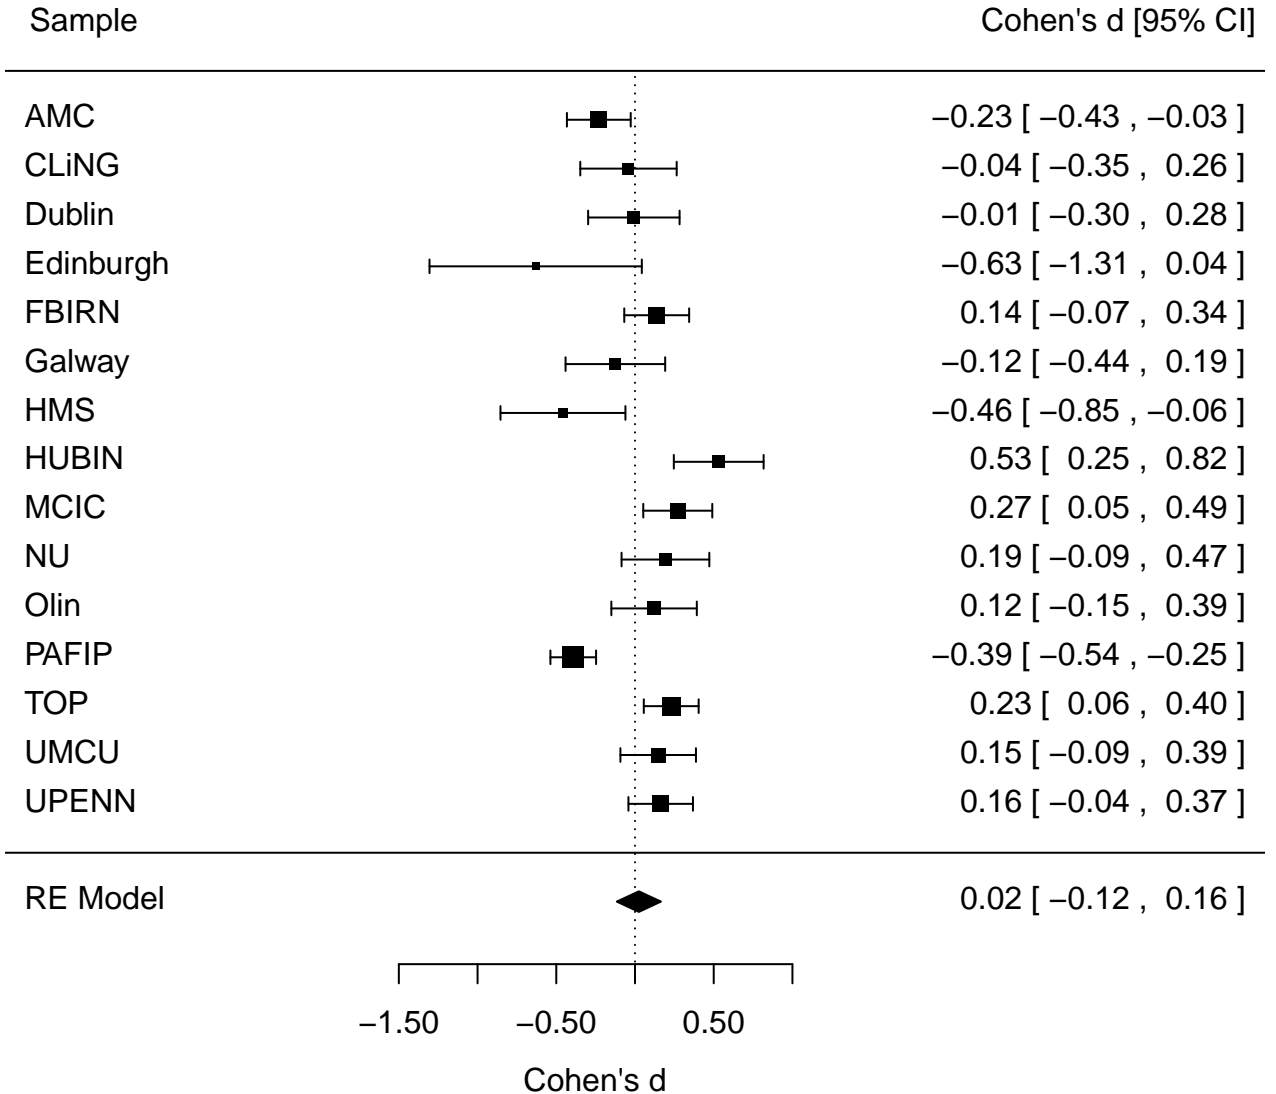

# Left Caudate

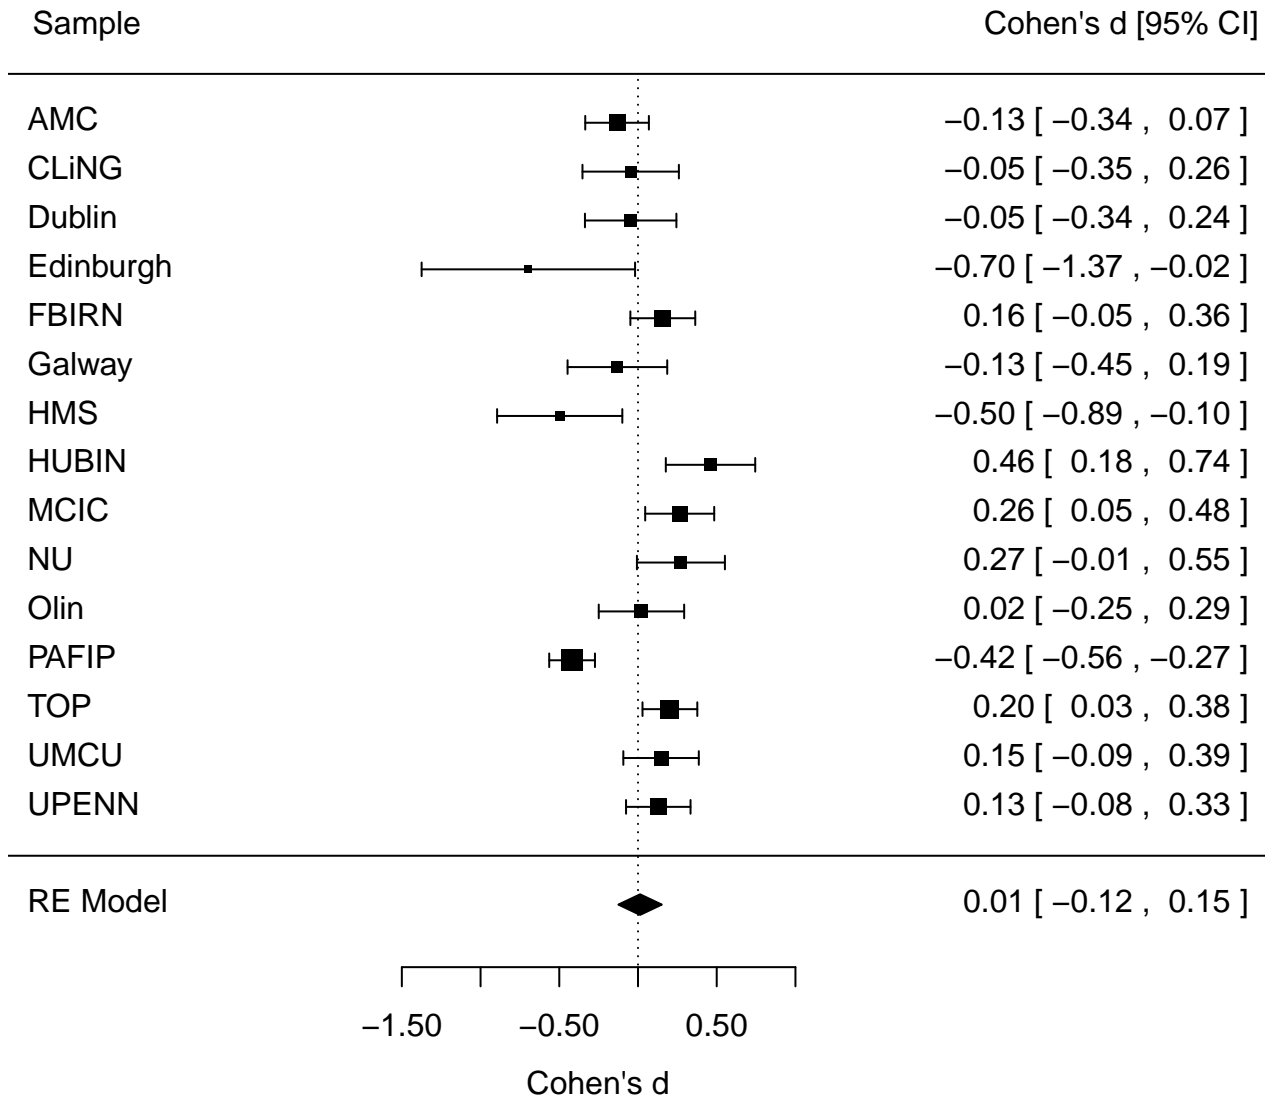

# Right Caudate

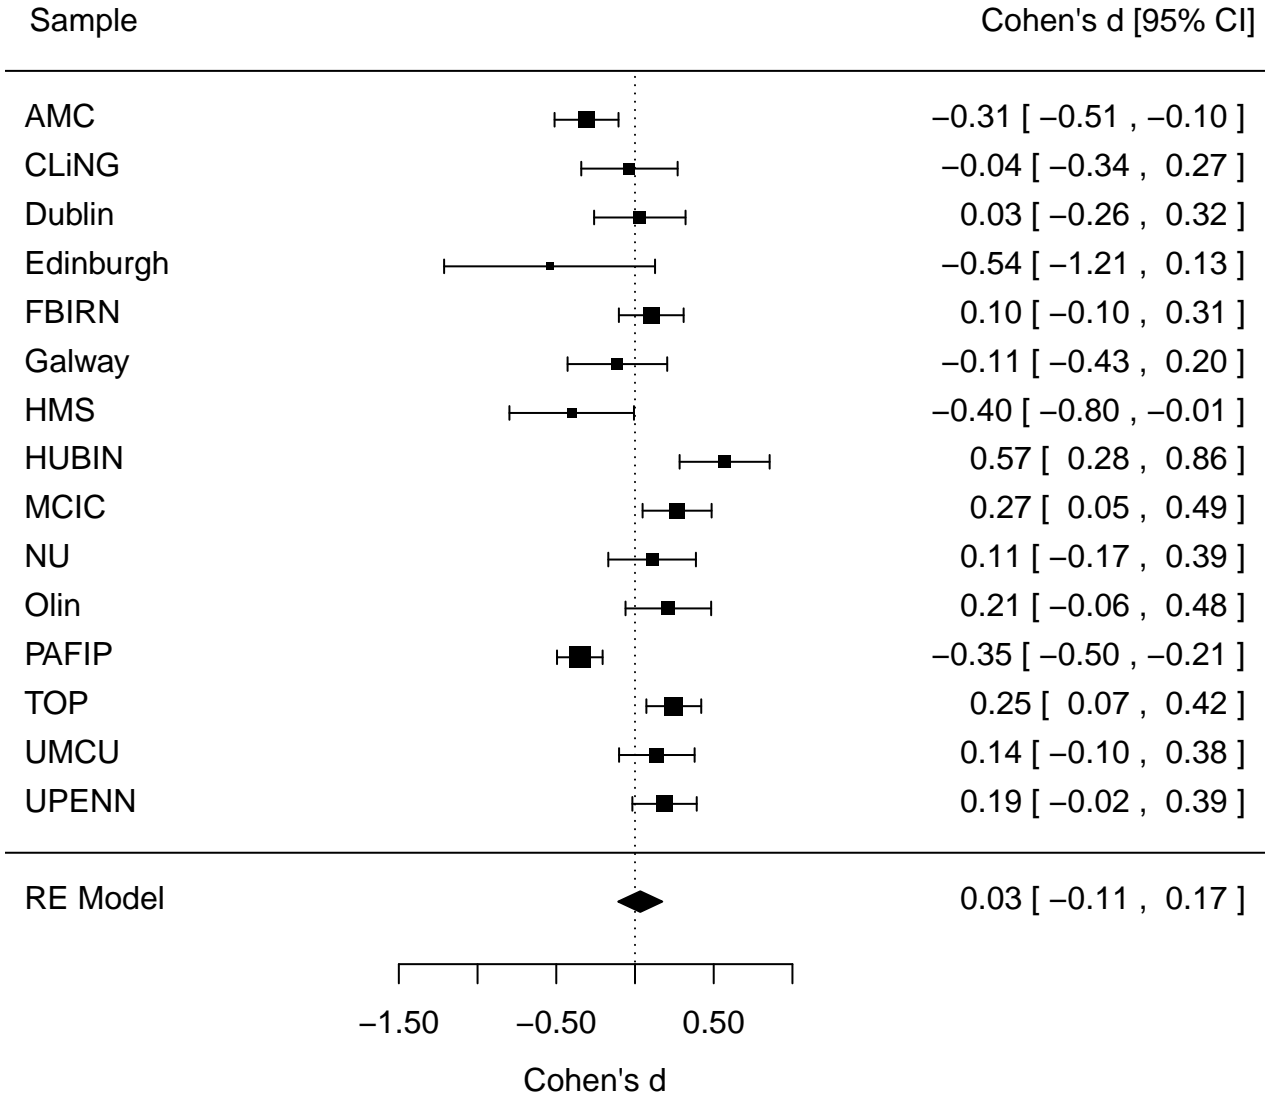



# Mean Putamen

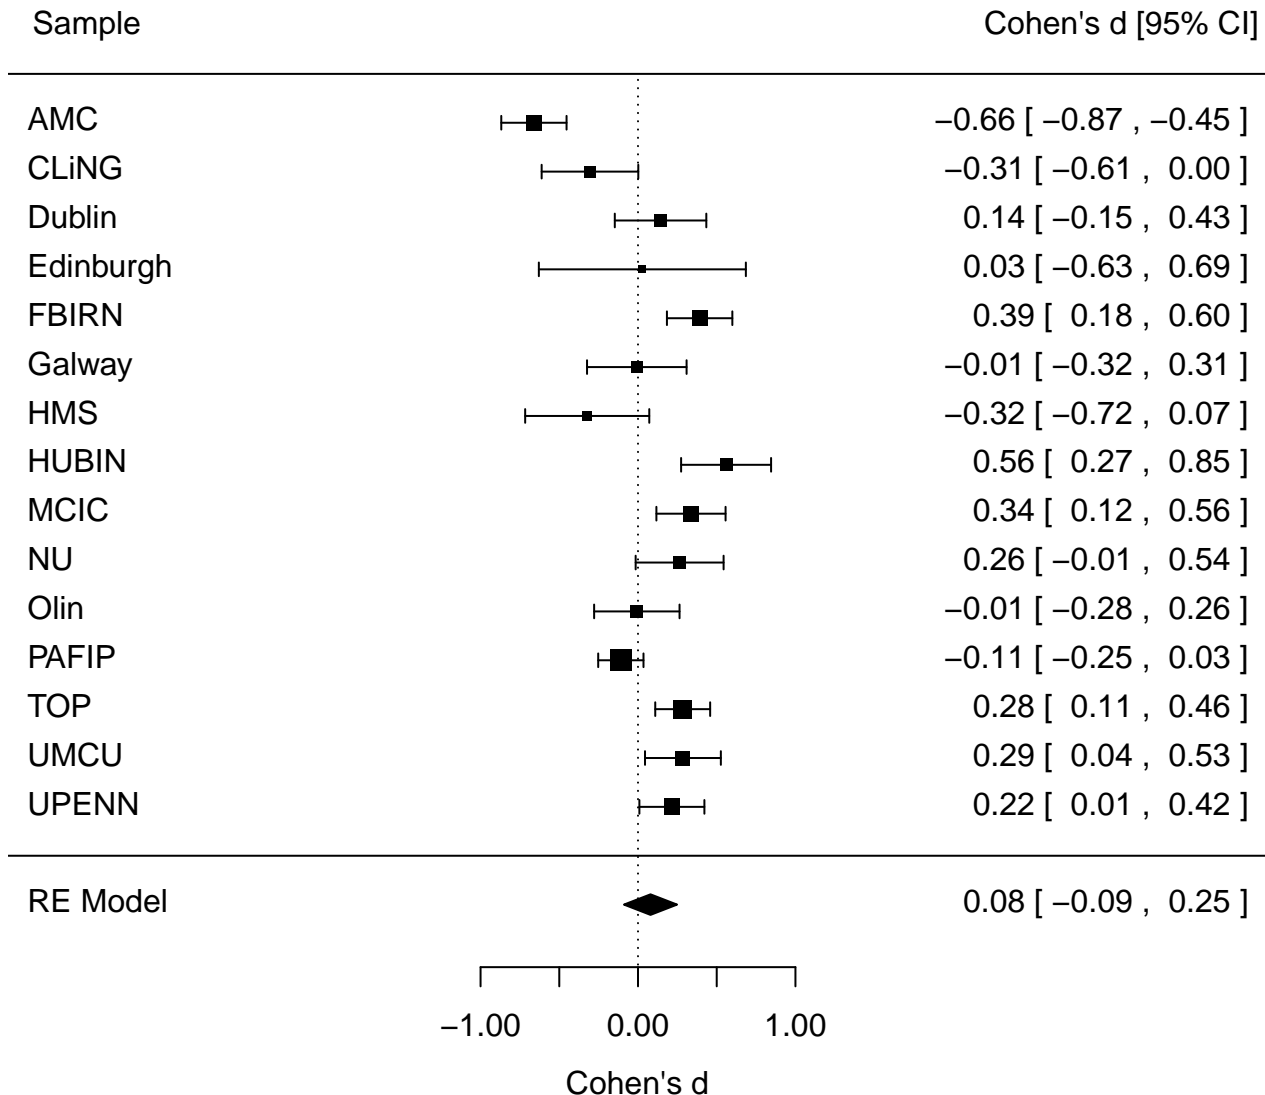

# Left Putamen

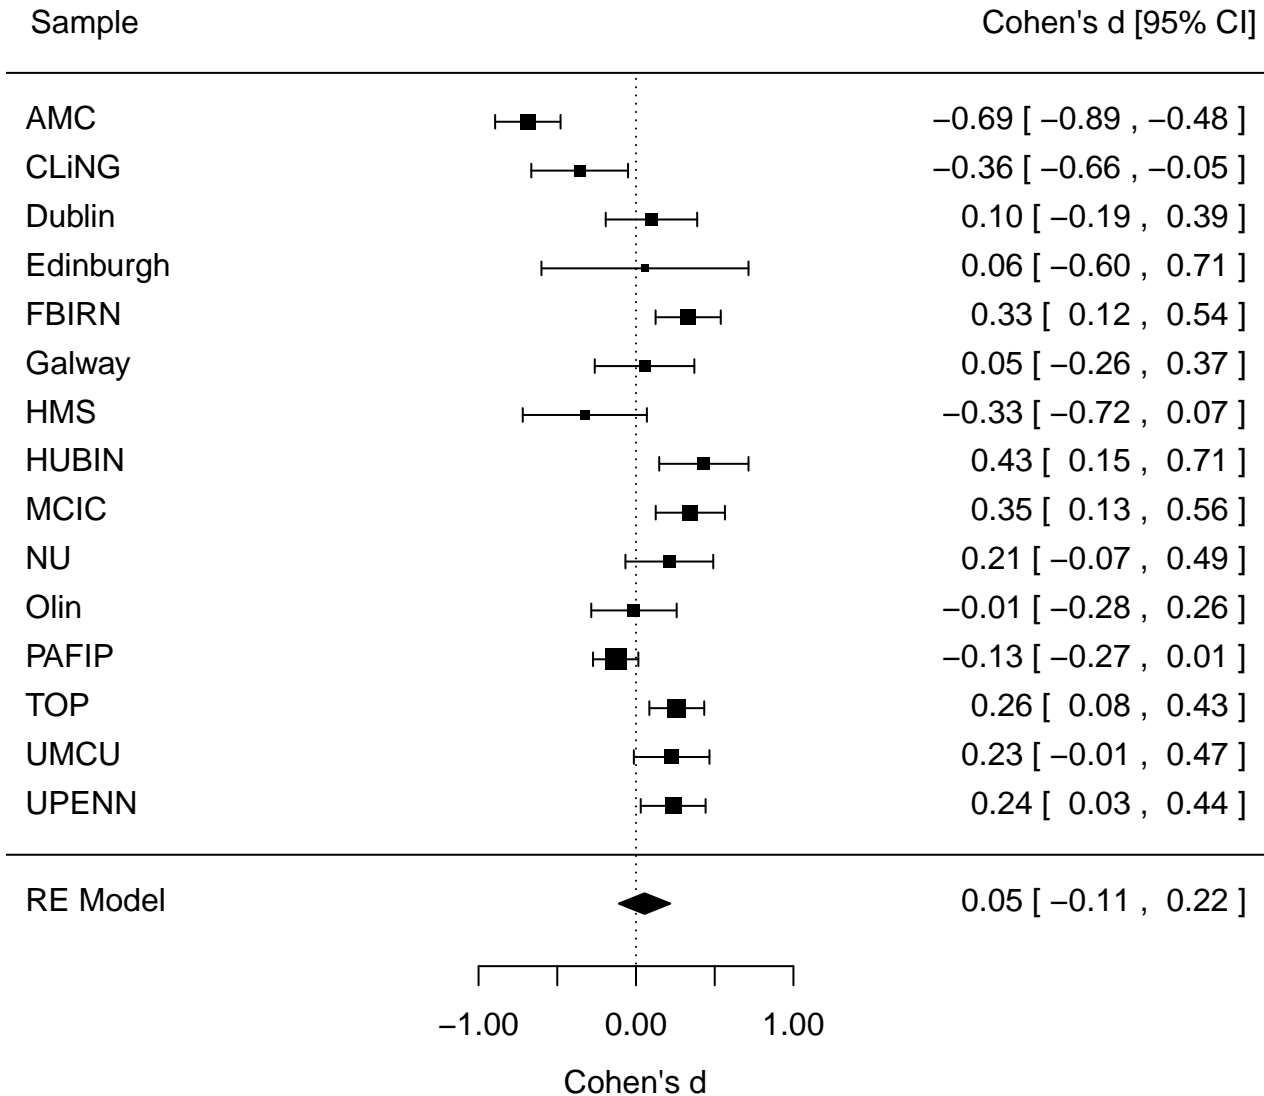

# Right Putamen

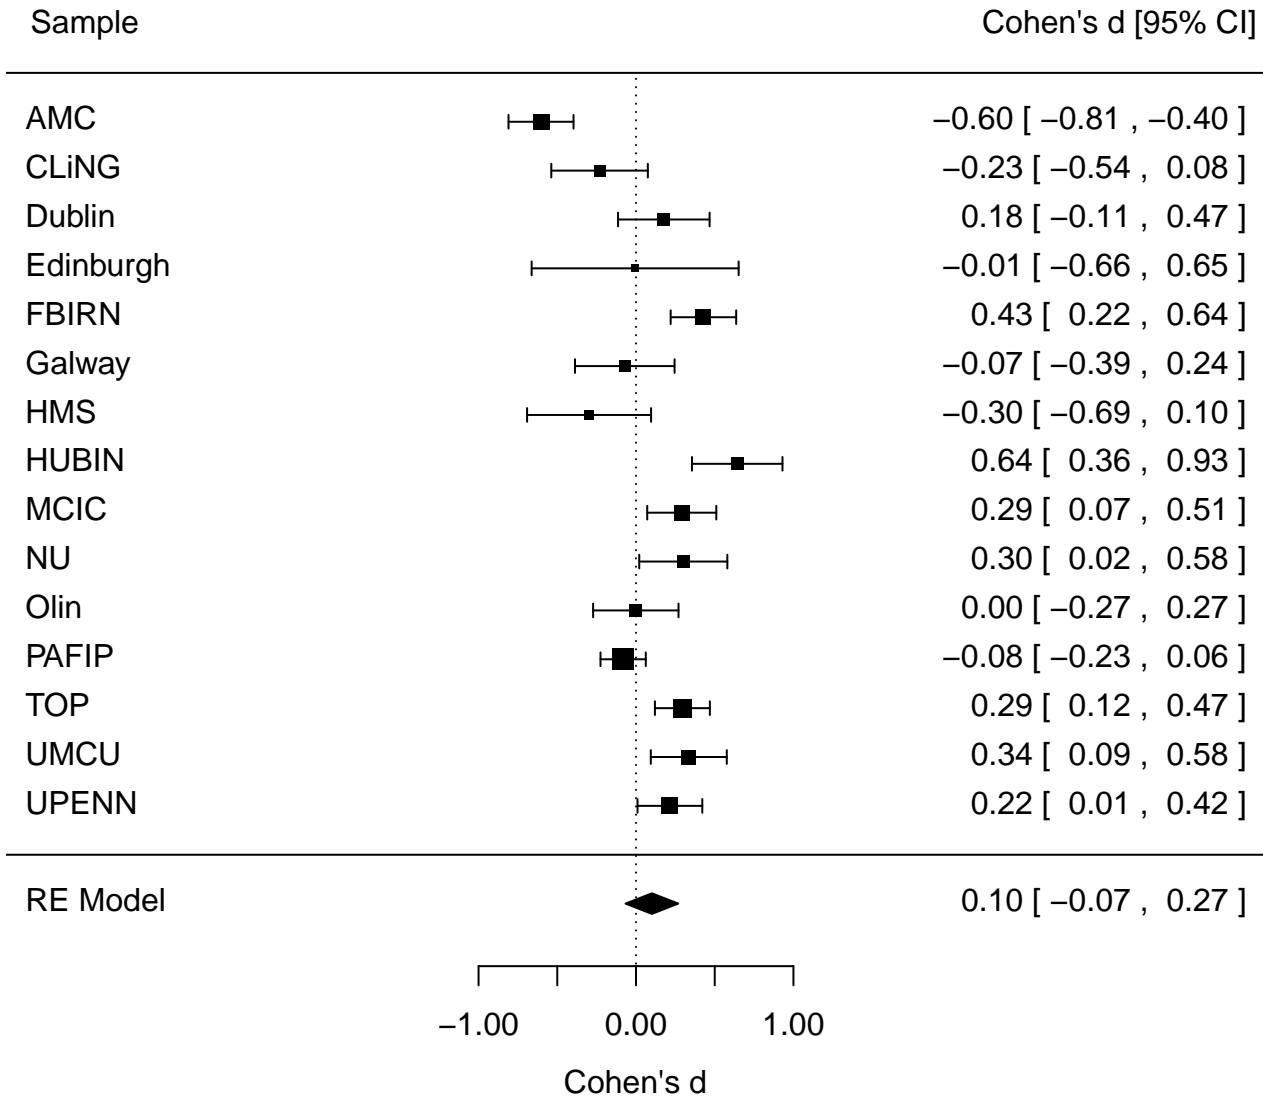

# Mean Palidum

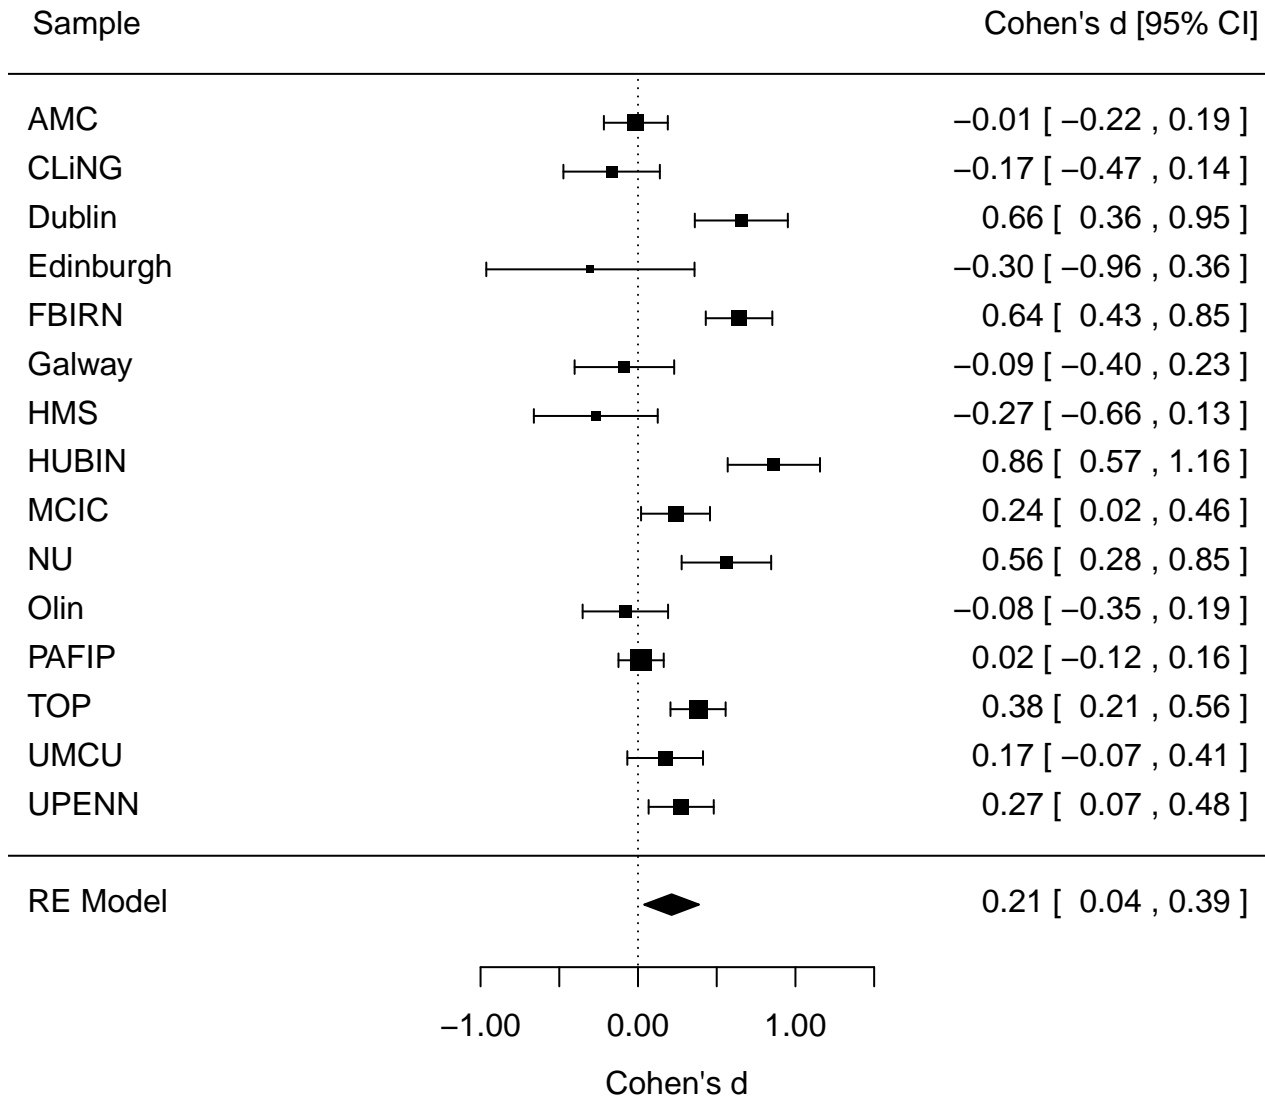

# Left Pallidum

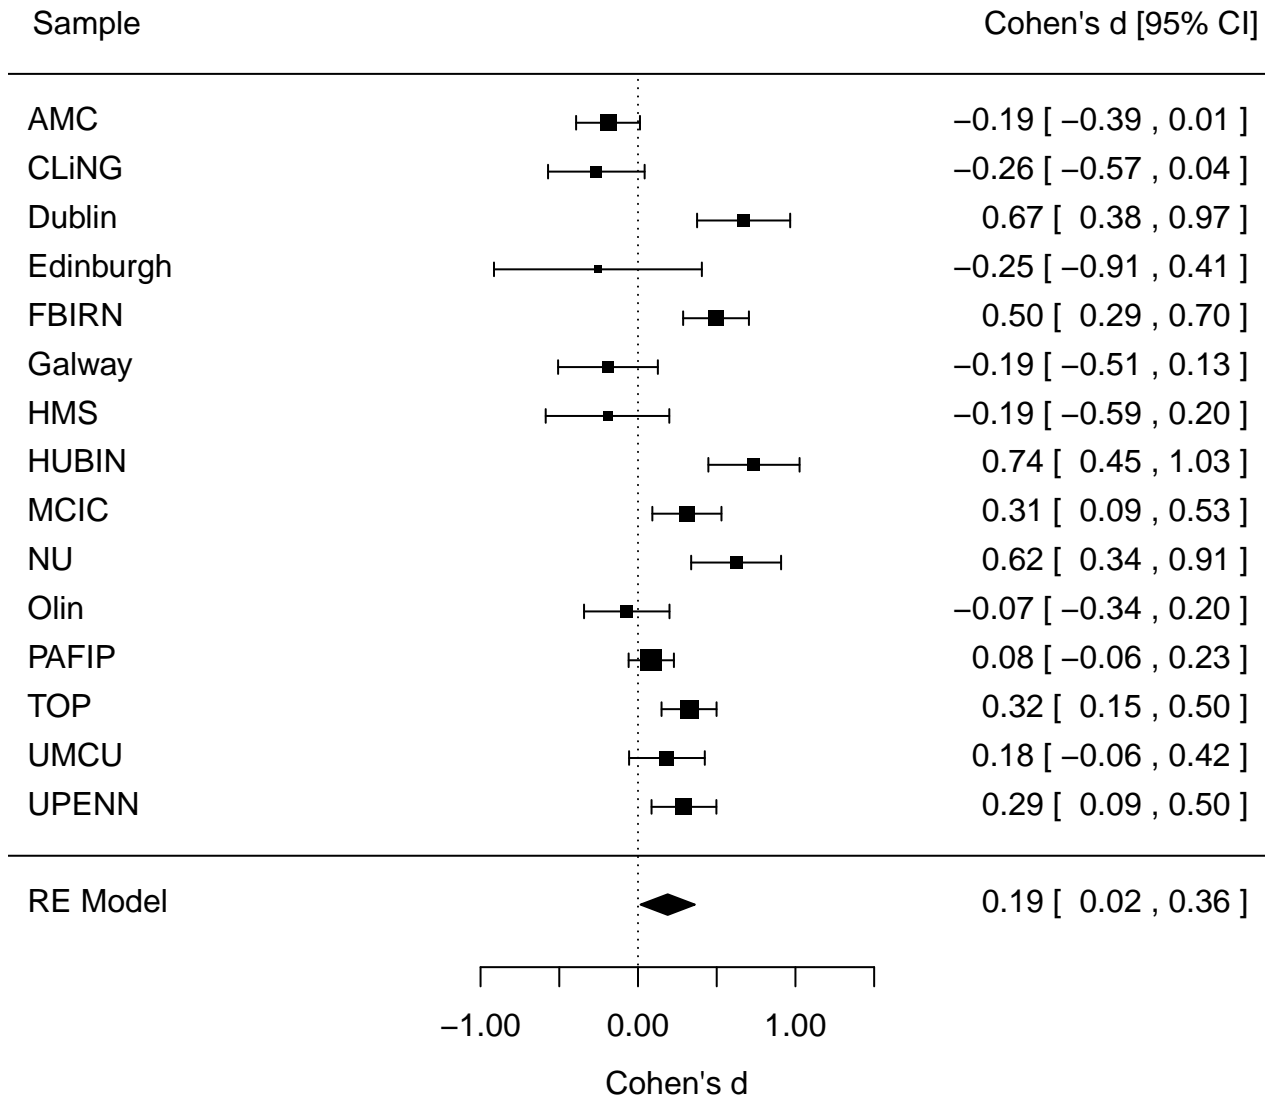

# Right Palidum

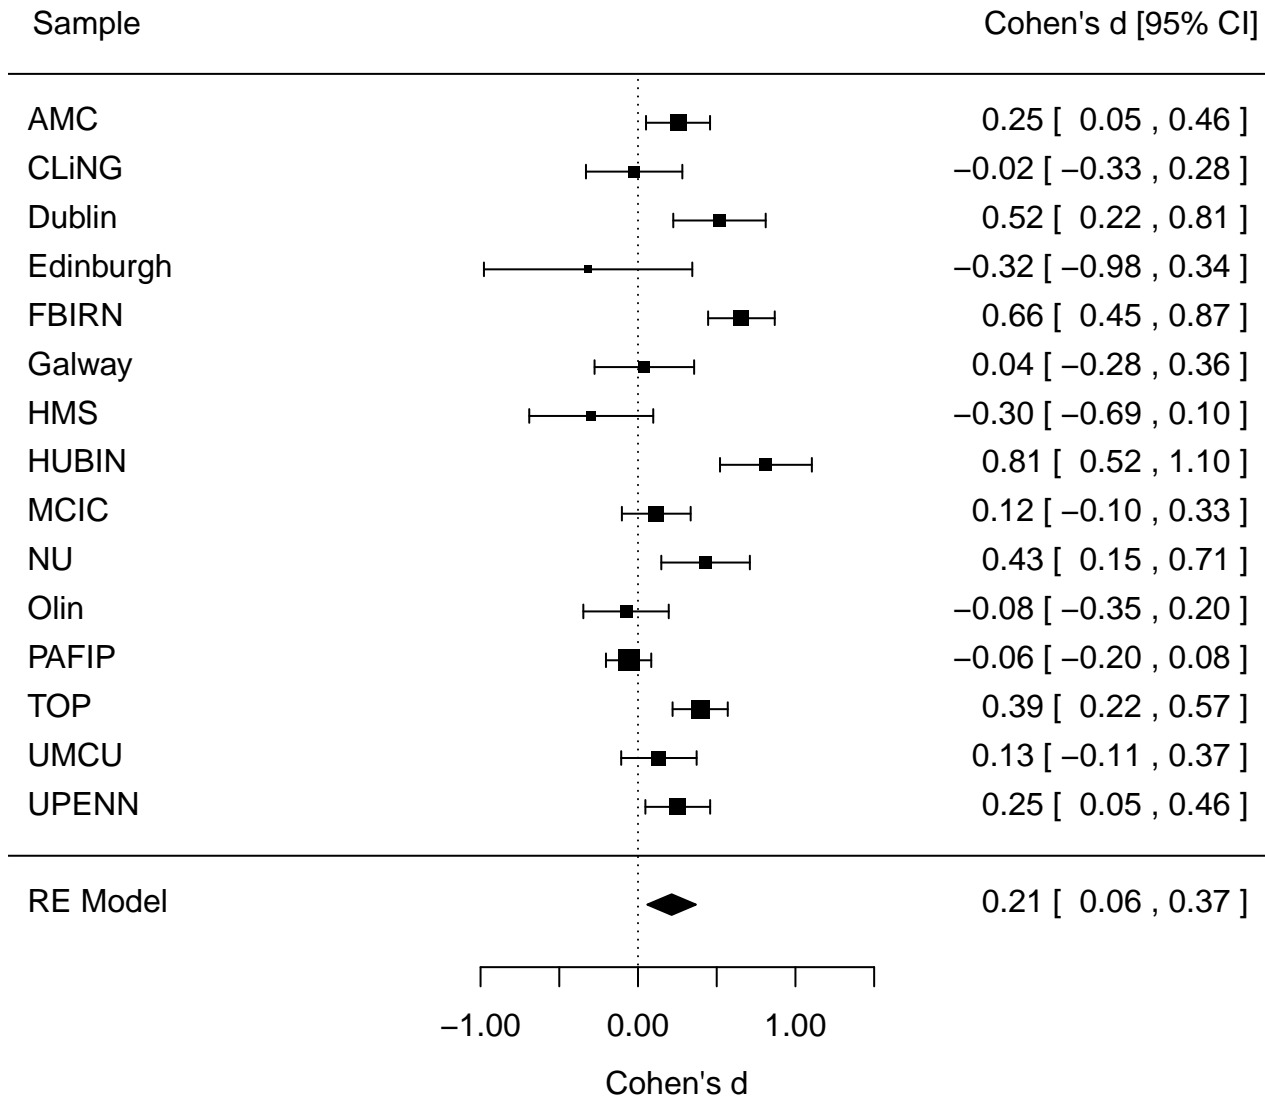

# Mean Lateral Ventricle

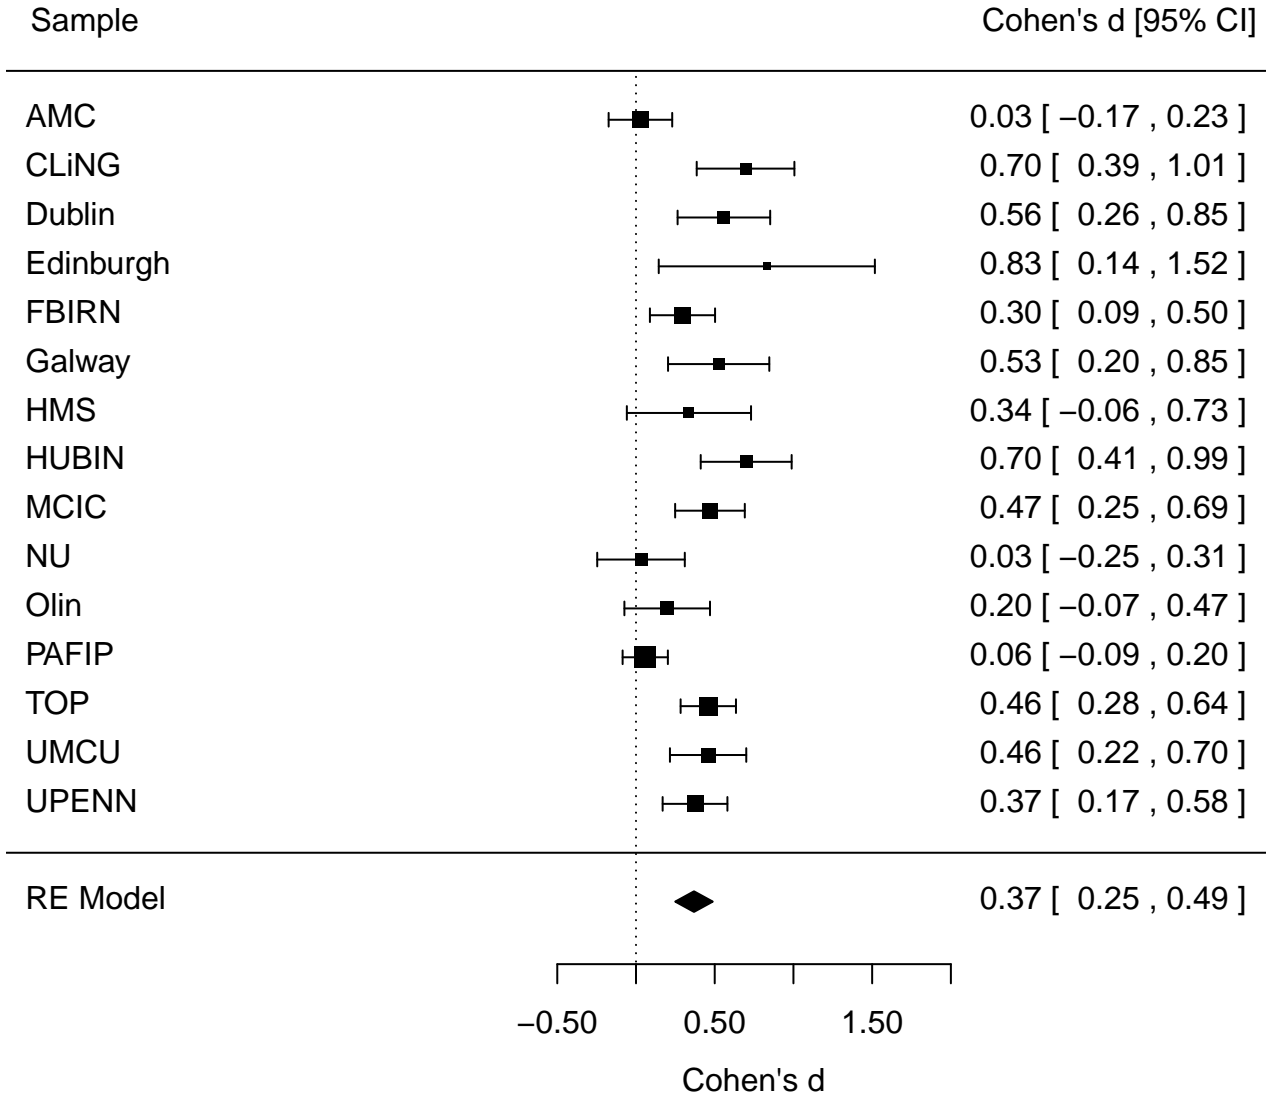

# Left Lateral Ventricle

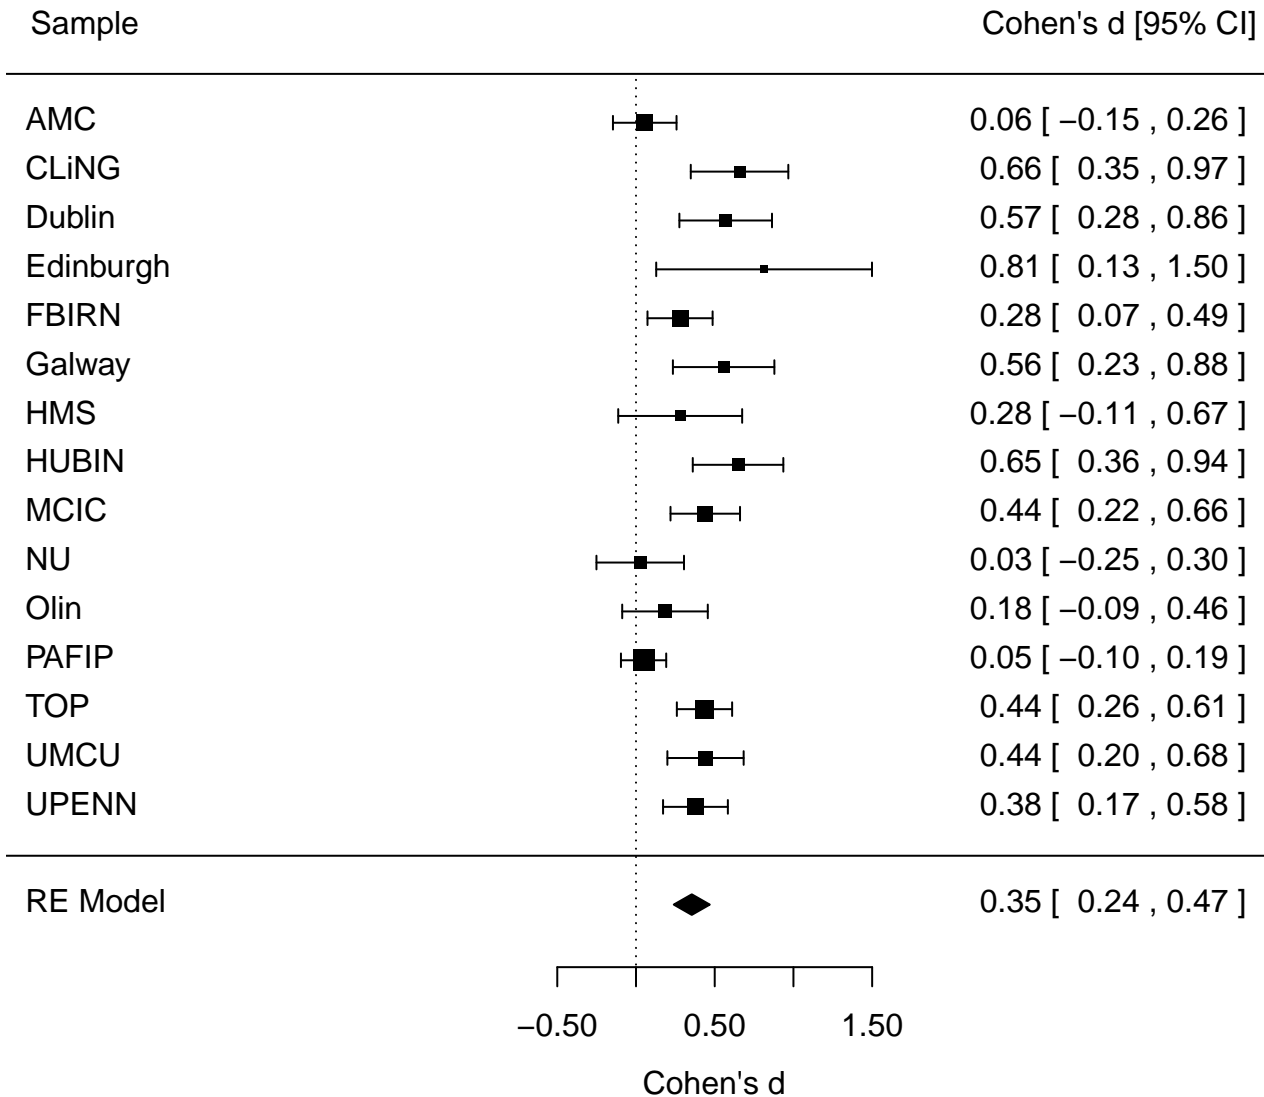



# Right Lateral Ventricle

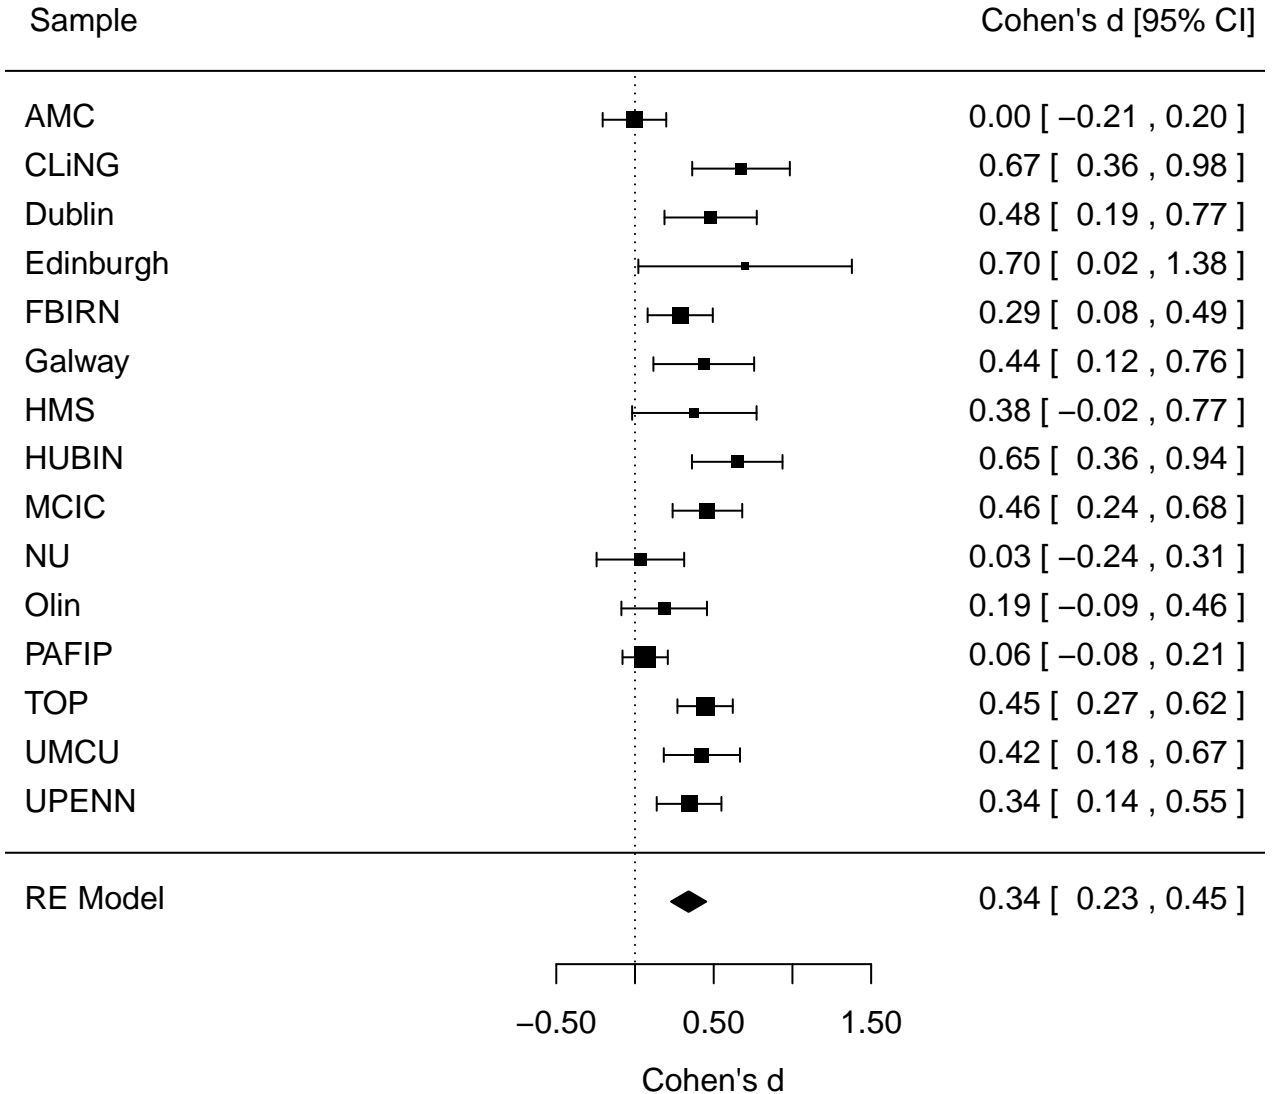

Supplement: mp201563x3.pdf [file mp201563x3.pdf]
