# Supplementary material
Source: PubMed Central journal article supplement (PMC4804179)

# Mean Putamen

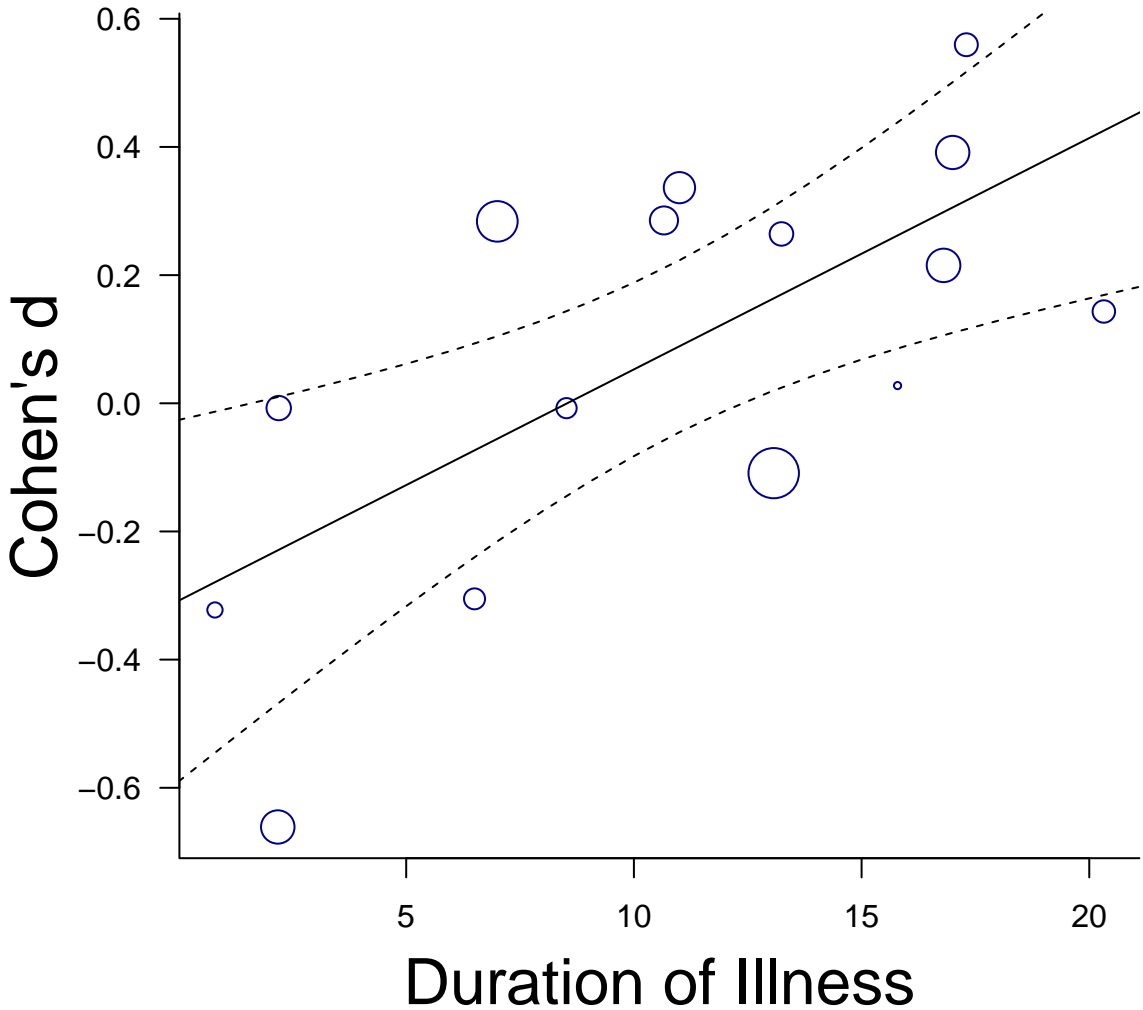

# Mean Putamen

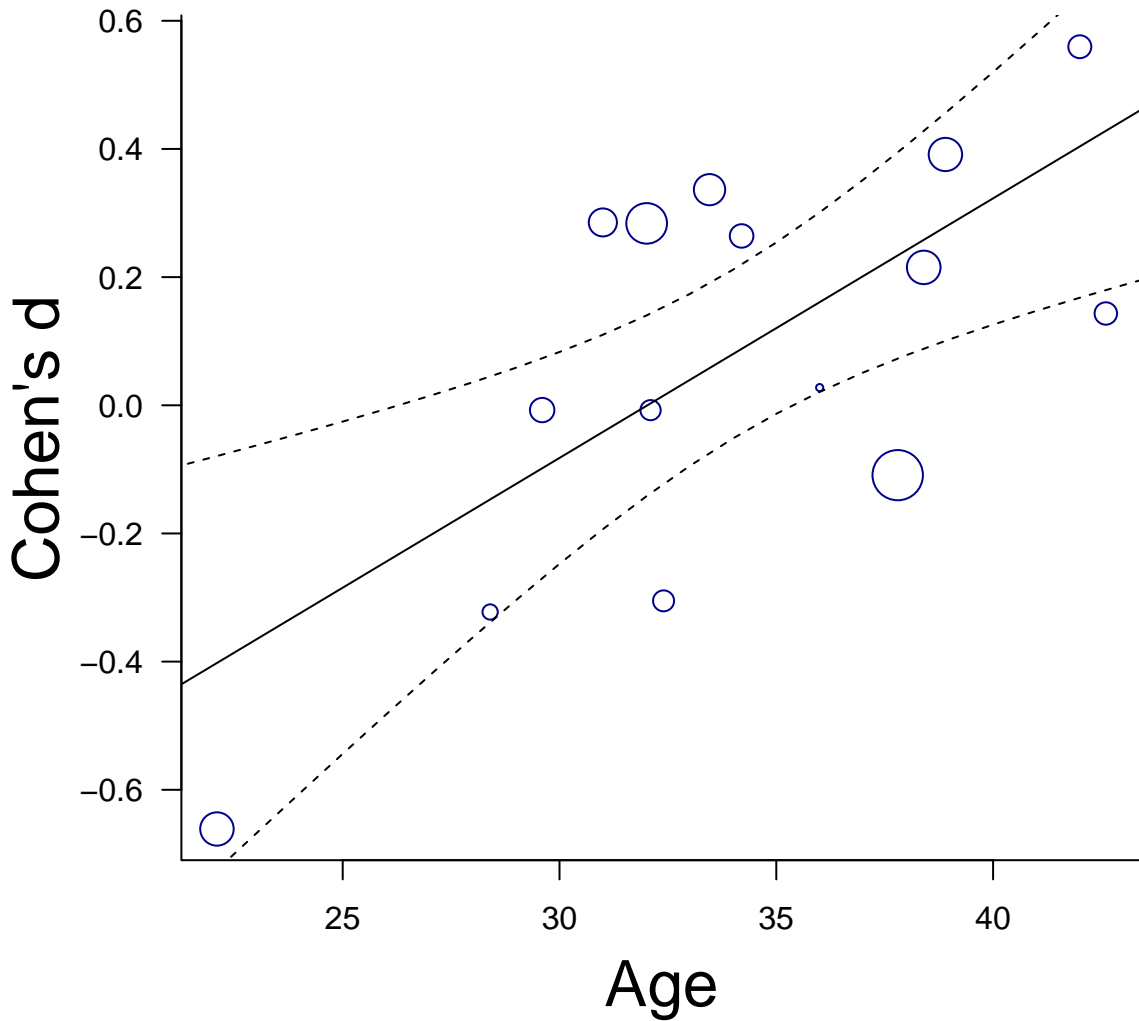

# Mean Pallidum

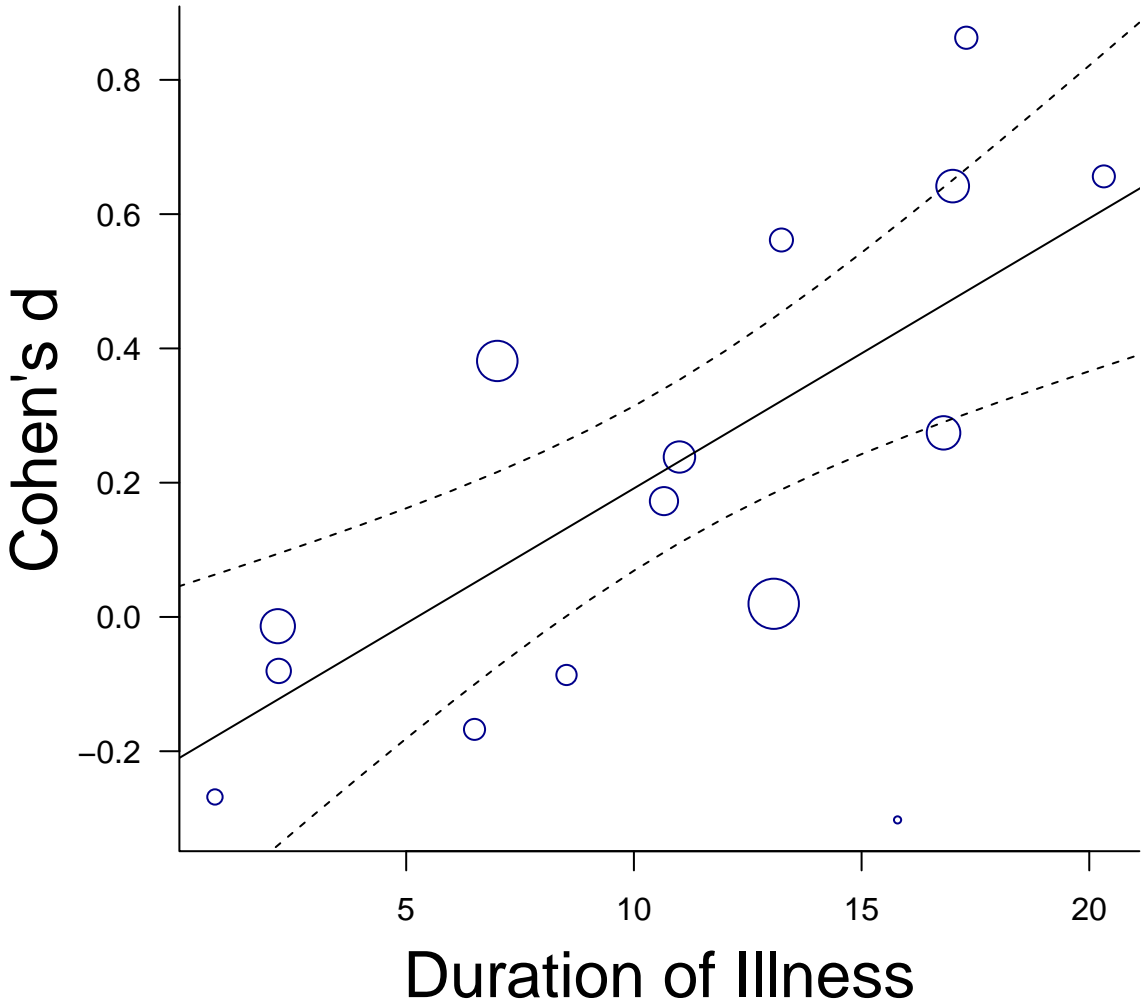

# Mean Pallidum

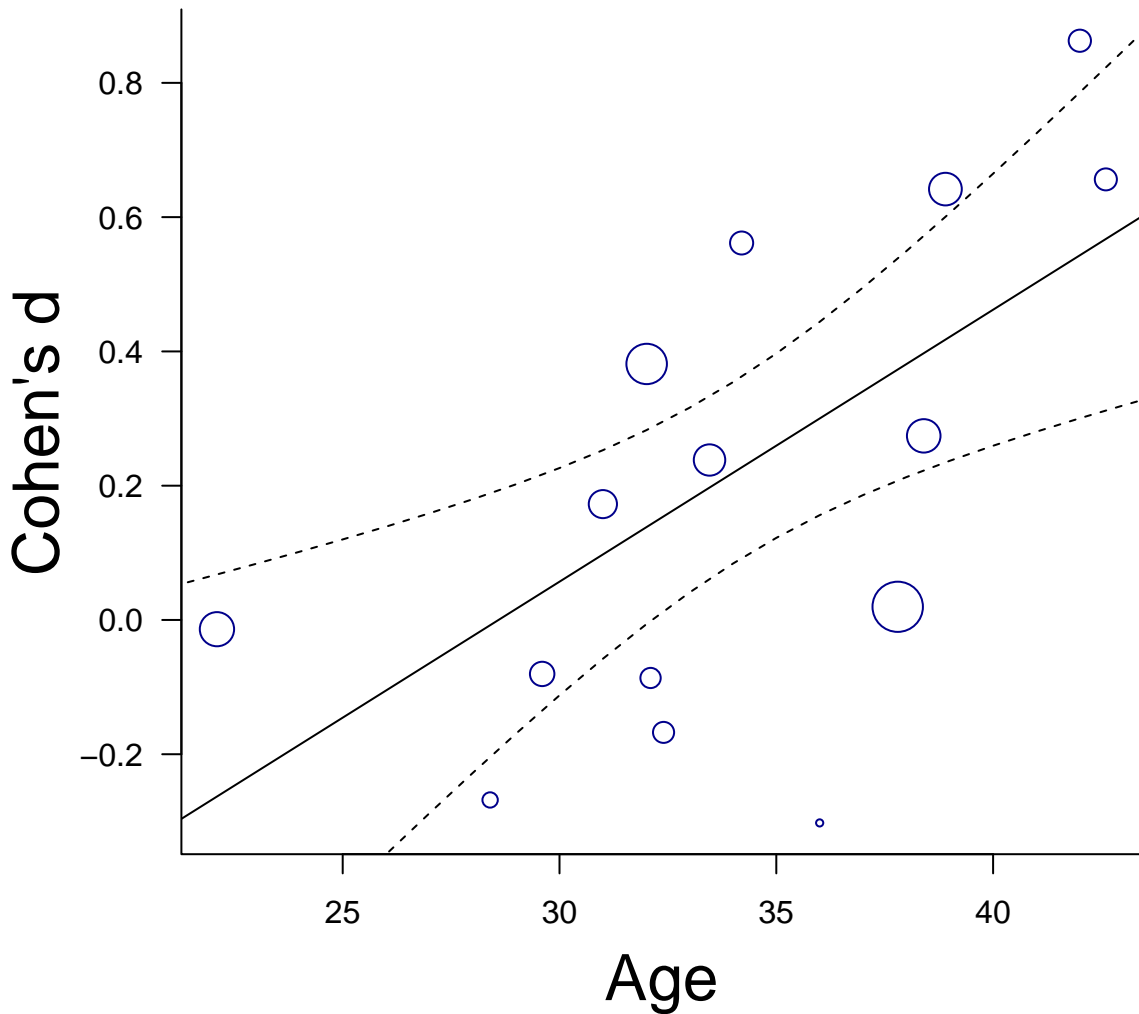

# Mean Hippocampus

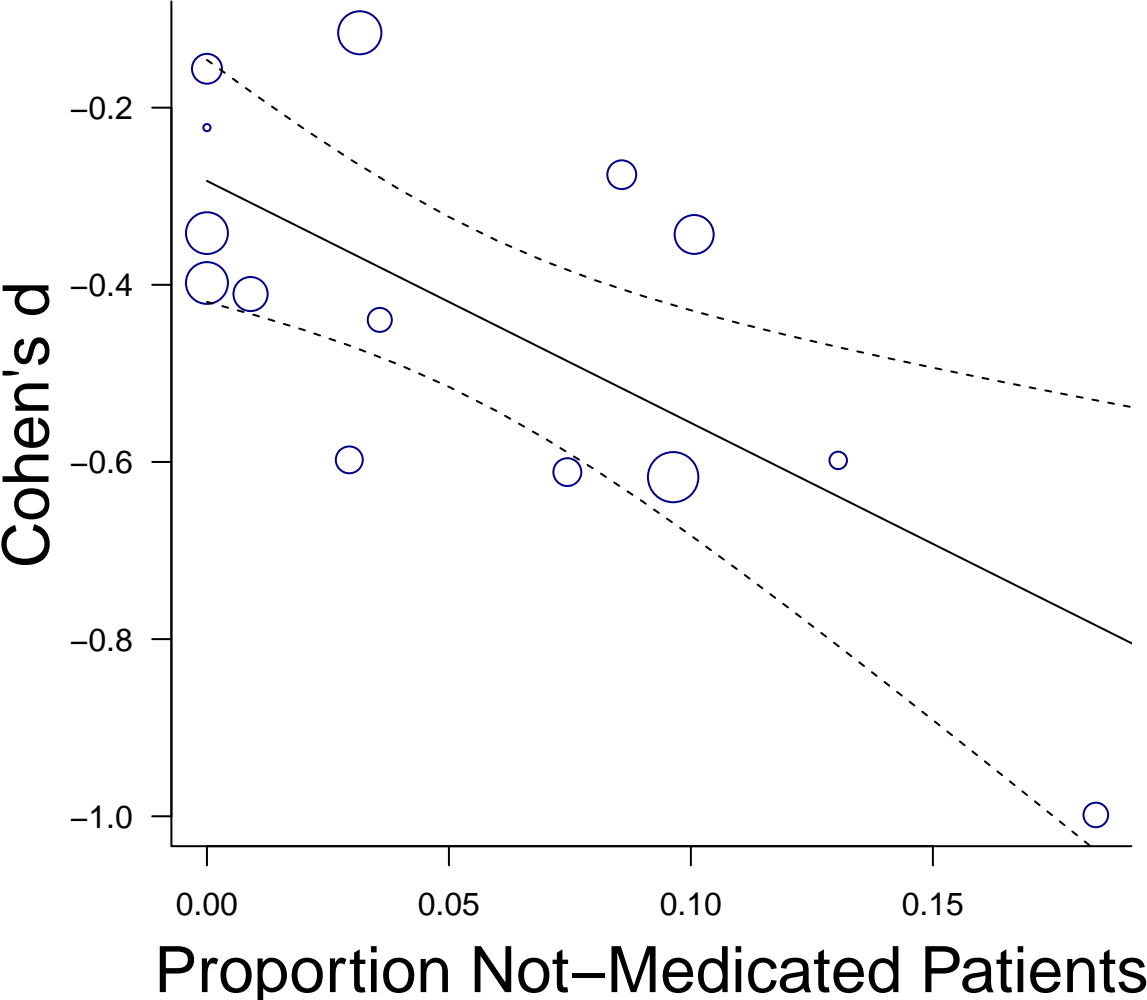

Supplement: mp201563x4.pdf [file mp201563x4.pdf]
